# Supplementary material
Source: PubMed Central journal article supplement (PMC3605770)
Supplement: NIHMS50372-supplement-1.pdf [file NIHMS50372-supplement-1.pdf]

## **Supplementary Information**

### **Emergence and global spread of epidemic healthcare-associated**

#### ***Clostridium difficile***

Miao He, Fabio Miyajima, Paul Roberts, Louise Ellison, Derek J. Pickard, Melissa J. Martin, Thomas R. Connor, Simon R. Harris, Derek Fairley, Kathleen B. Bamford, Stephanie D'Arc, Jon Brazier, Derek Brown, John E. Coia, Gill Douce, Dale Gerding, Hee Jung Kim, Tse Hsien Koh, Haru Kato, Mitsutoshi Senoh, Tom Louie, Stephen Michell, Emma Butt, Sharon J. Peacock, Nick M. Brown, Tom Riley, Glen Songer, Mark Wilcox, Munir Pirmohamed, Ed Kuijper, Peter Hawkey, Brendan W. Wren, Gordon Dougan, Julian Parkhill, Trevor D. Lawley

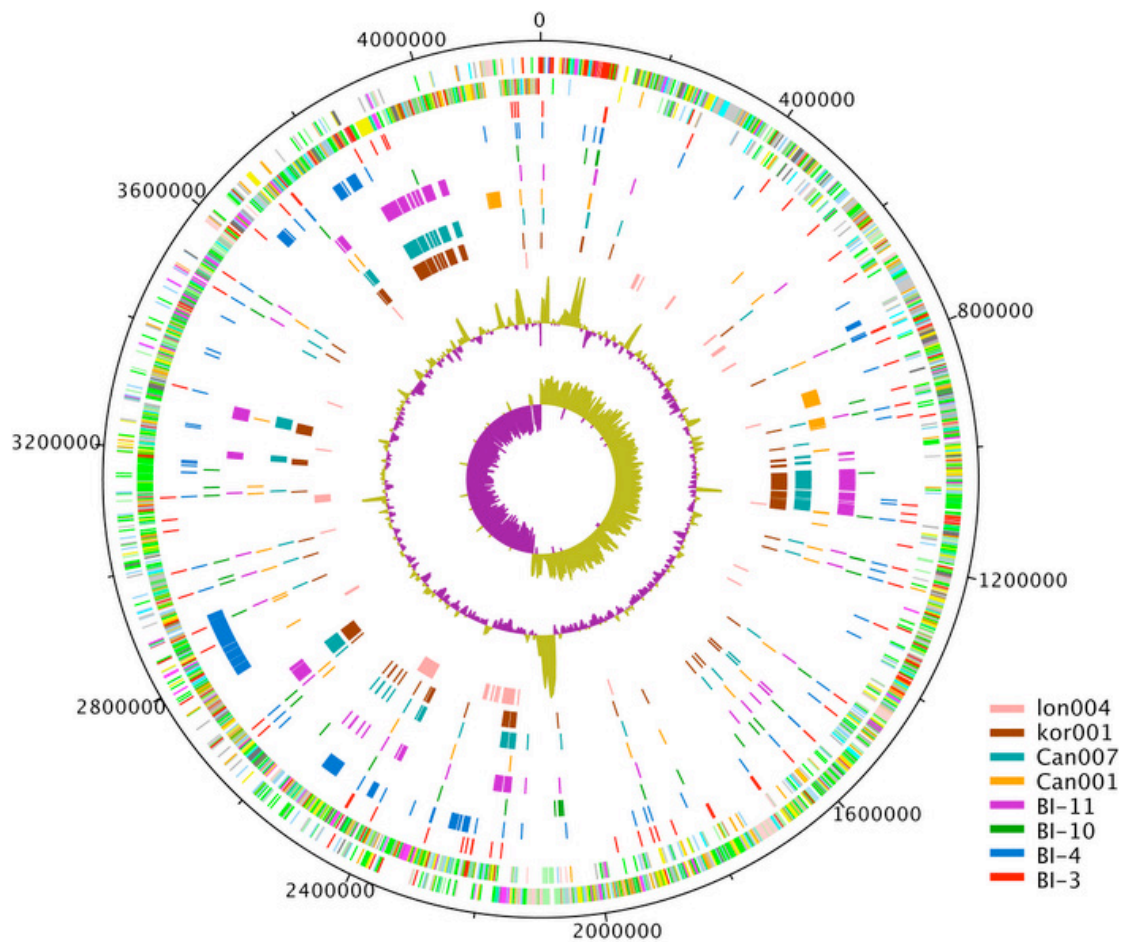

Supplementary Figure 1. Evidence of homologous recombination within eight *C. difficile* 027/BI/NAP1 isolates. Outer circle: Coding sequences of R20291 genome, shown on a pair of concentric rings representing both coding strands; two inner circles: G+C% content plot and GC deviation plot (>0% olive, <0% purple); in between: SNPs between R20291 and eight isolates (from outer to inner: BI-3, BI-4, BI-10, BI-11, Can001, Can007, kor001, lon004), colored according to legend.

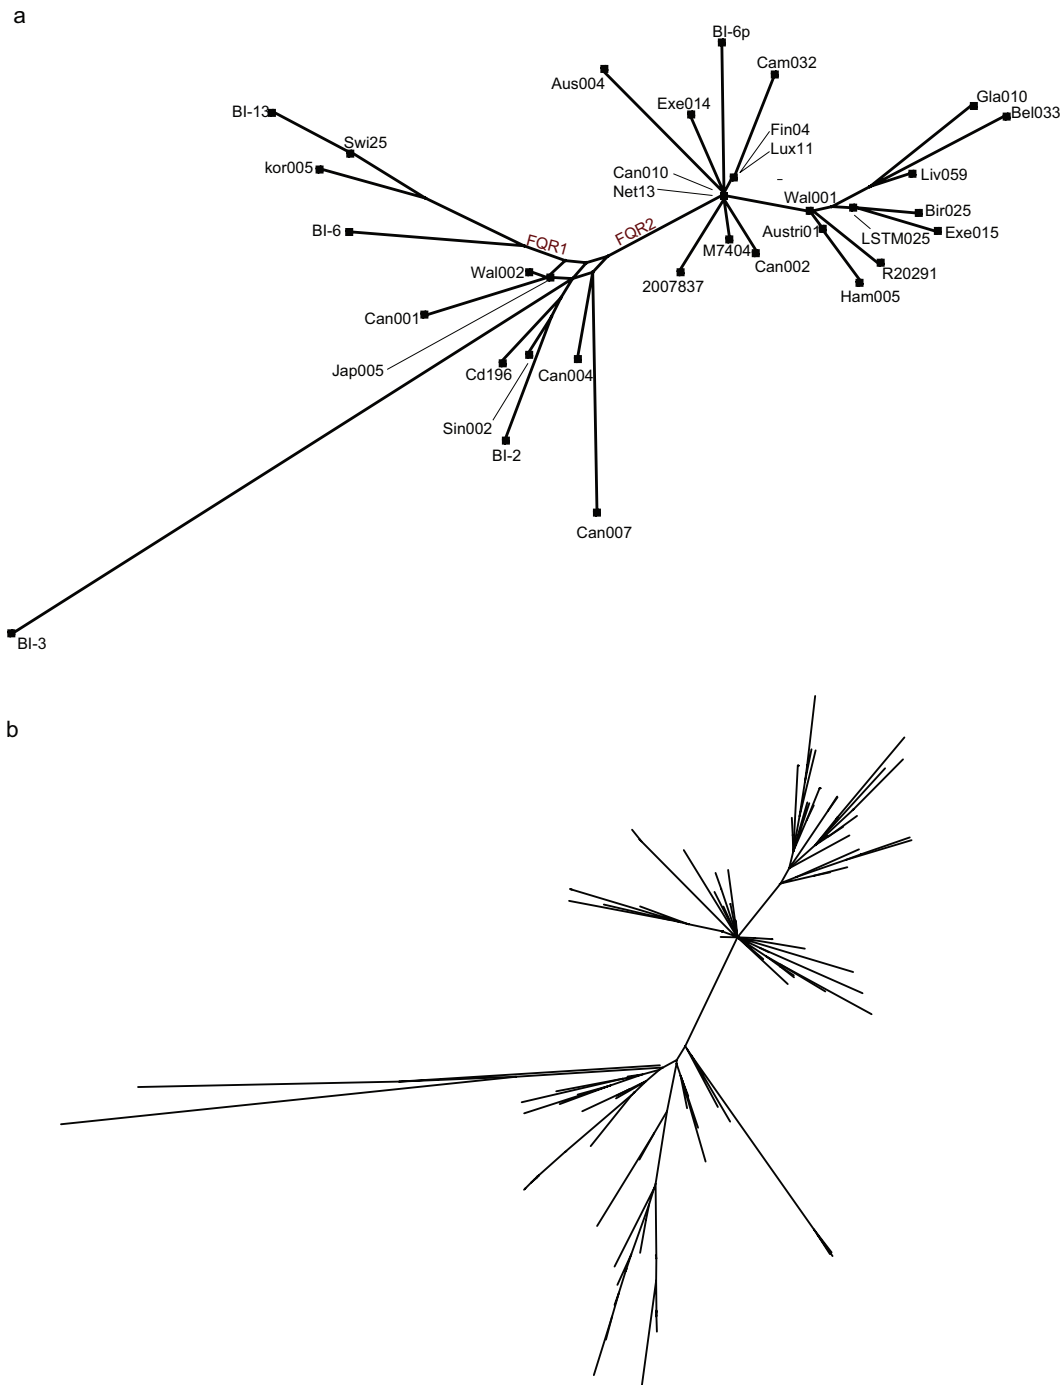

Supplementary Figure 2. Independent methods support robust global phylogeny of *C. difficile* 027/BI/NAP1. Phylogeny of *C. difficile* 027/BI/NAP1 isolates was inferred with split-decomposition algorithm (a) and neighbor-joining method (b). Numbers of isolates included are 34 (a) and 151 (b).

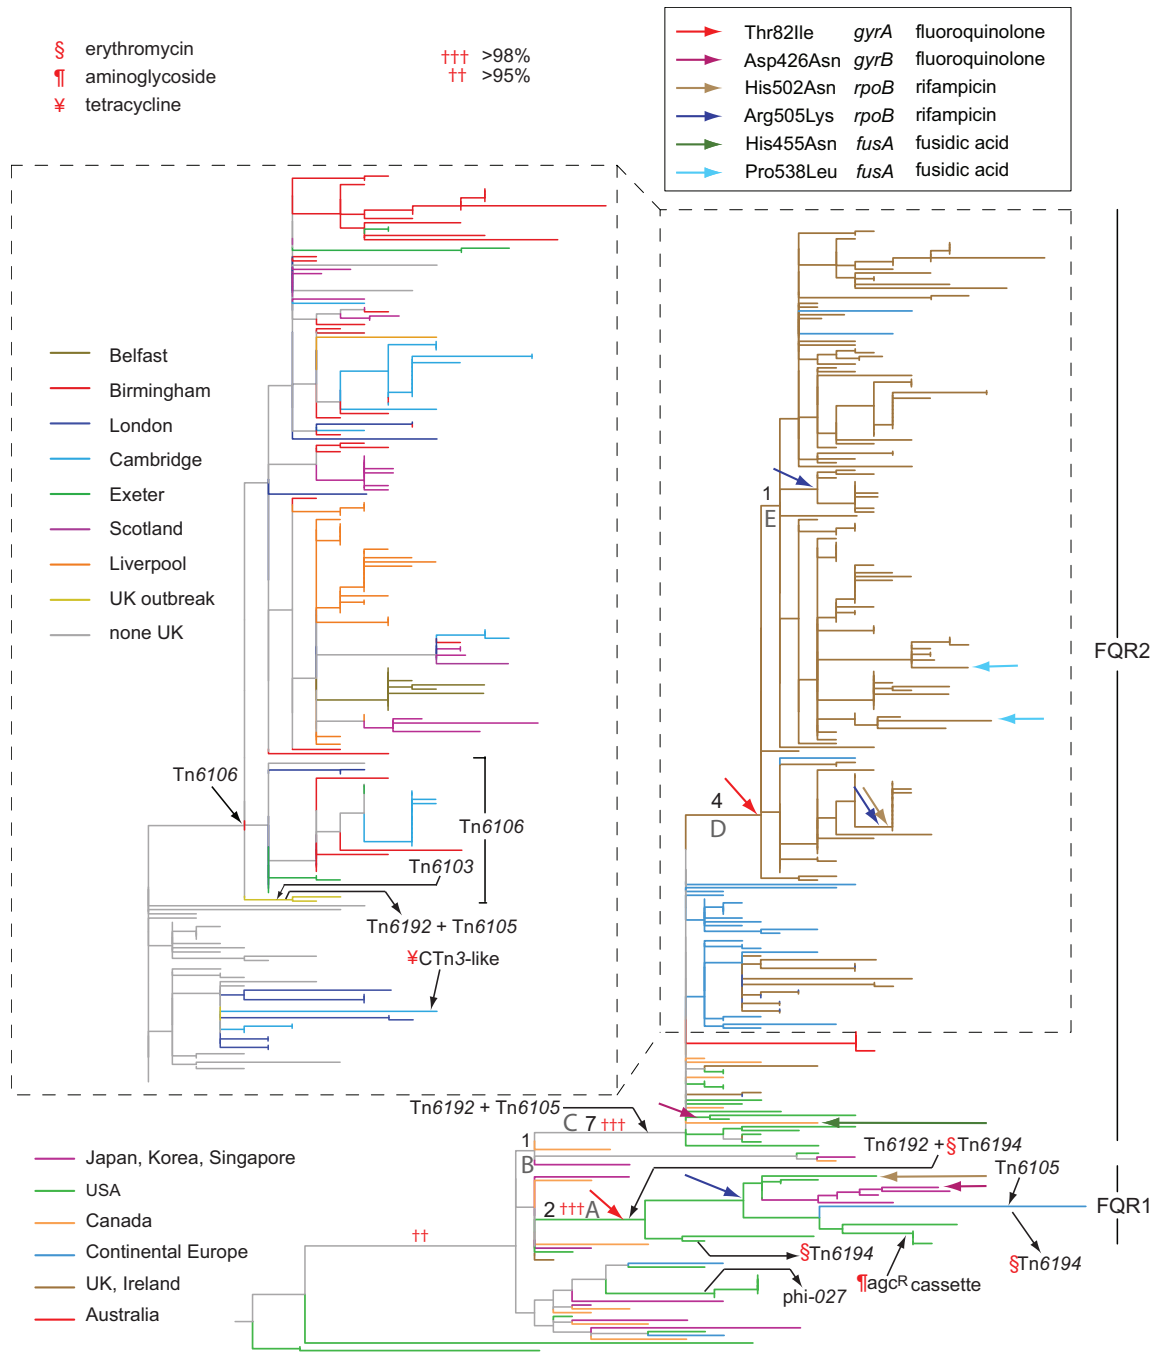

Supplementary Figure 3. Maximum-likelihood phylogeny of global and UK *C. difficile* 027/BI/NAP1 collection (n=296) based on core genome SNPs. Branches colors indicate the geographical sources of the isolates. An insert is shown to illustrate geographical sources of the UK isolates. Cross symbols give levels of support (in bootstrap values) for main branches. The numbers near the branches denote numbers of SNPs defining the main branches A-E. Arrows in colors indicate the isolates with

homoplasic SNPs associated with antibiotic resistance. Black arrows show insertion (towards the phylogeny) or deletion (away from the phylogeny) of selected mobile elements. The sub-lineage harboring *Tn6106* is depicted with a square bracket. Mobile elements carrying antibiotic resistance determinants are labeled with red symbols.

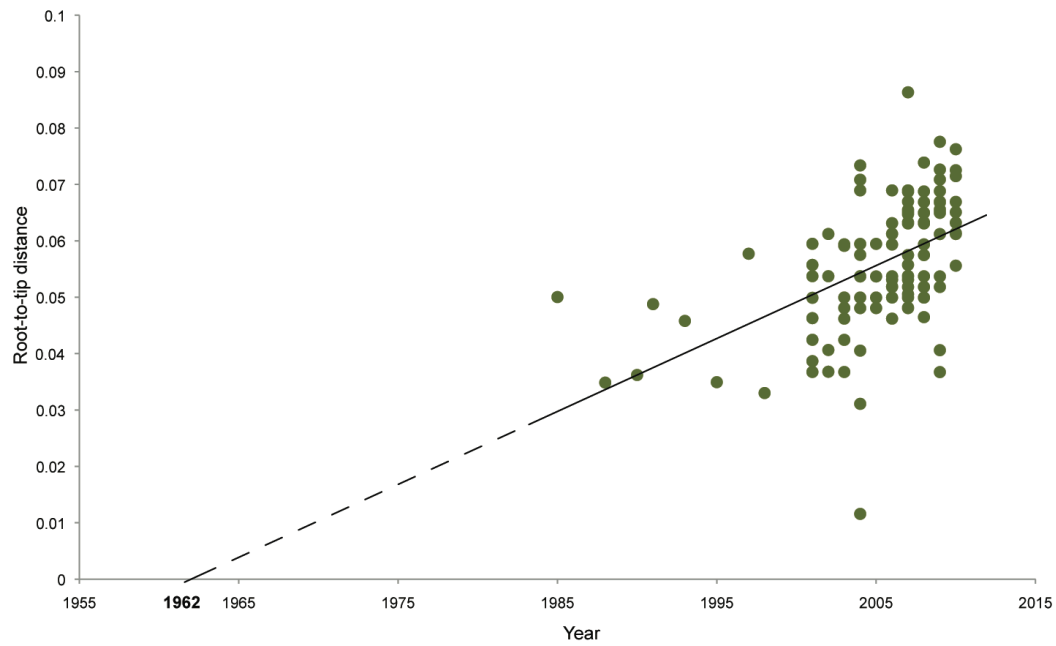

Supplementary Figure 4. Regression analysis between strain isolation dates (x-axis) and root-to-tip distance (y-axis). The analysis was conducted based on *C. difficile* 027/BI/NAP1 global collection (151 isolates). The point where the dashed line intersects with the x-axis gives the inferred date when the most recent common ancestor of *C. difficile* 027/BI/NAP1 emerged. R-square = 0.25. The weak correlation in this analysis is associated with the spore-forming lifestyle of *C. difficile*.

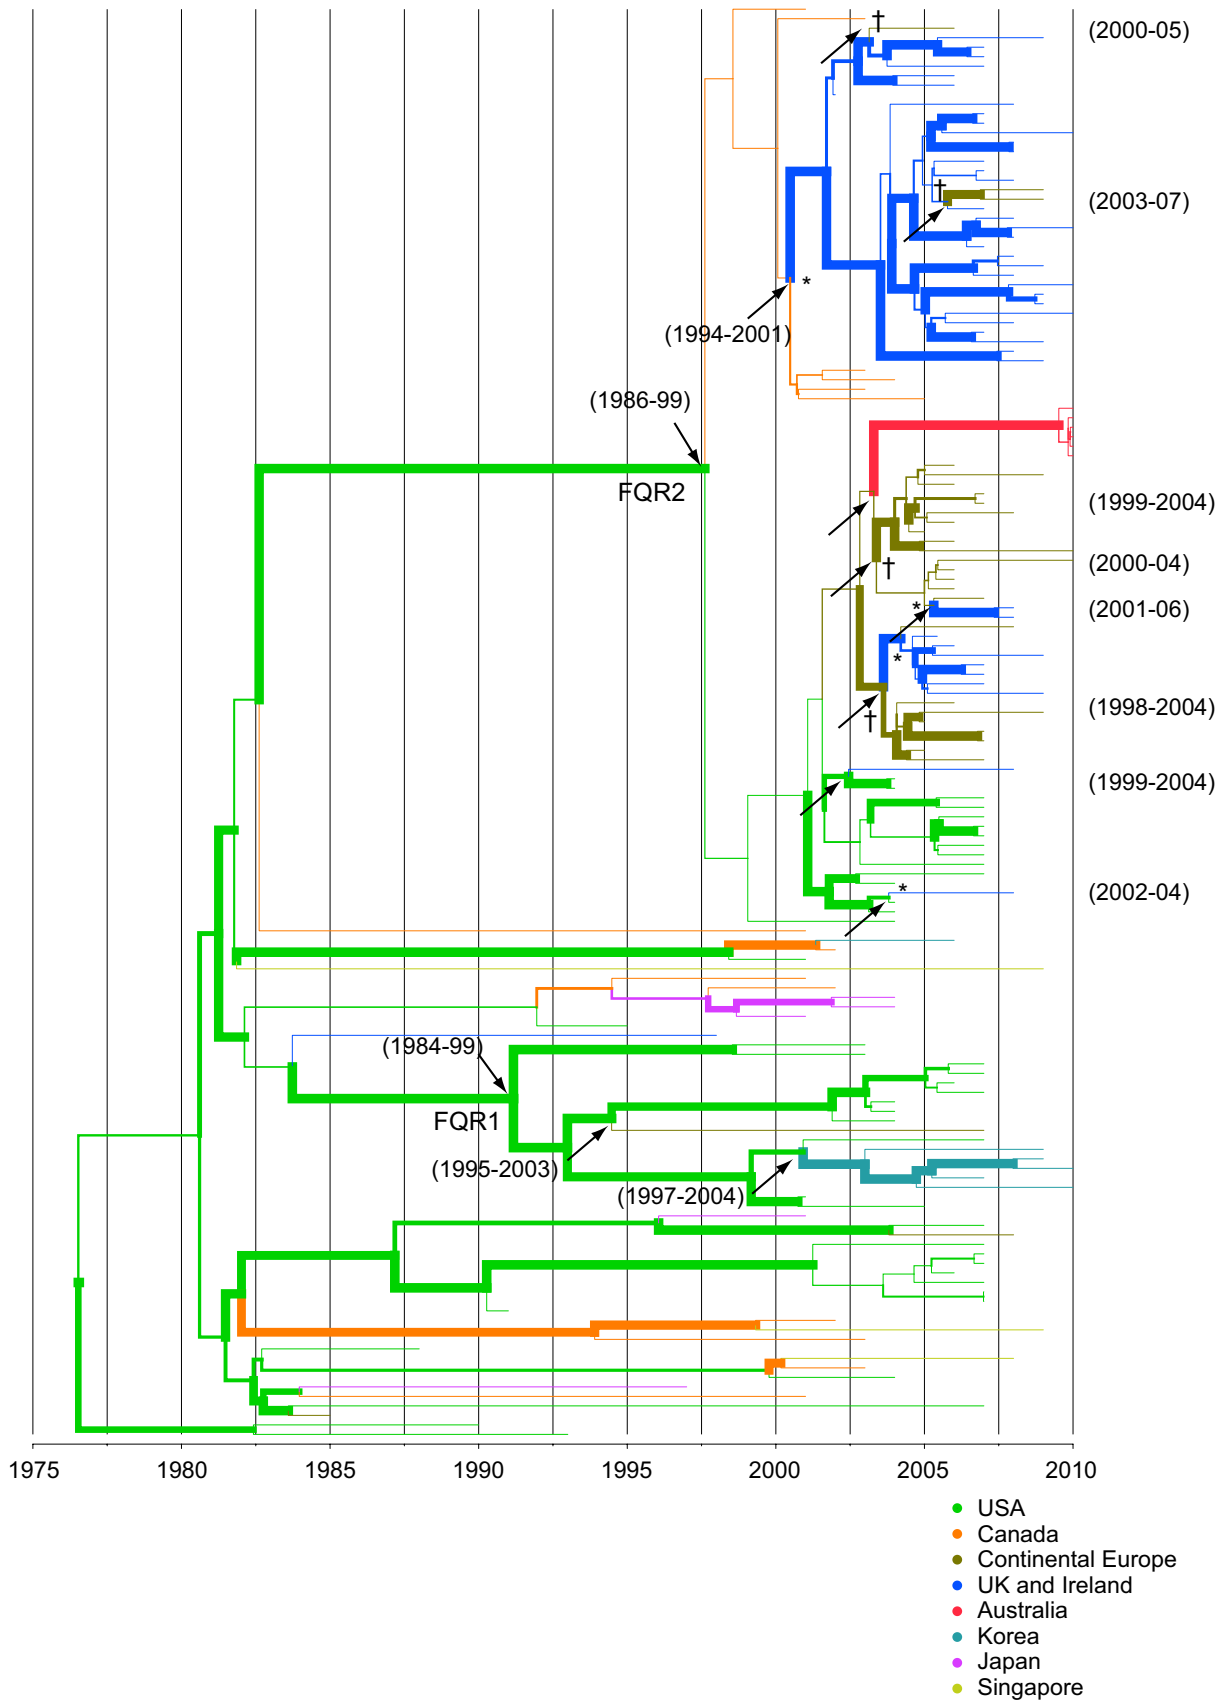

Supplementary Figure 5. Bayesian phylogeny of *C. difficile* 027/BI/NAP1 global collection with inferred geographic ancestry. Branches are colored according to actual or most probable origins of isolates. Line thickness of internal branches is proportional of the support (posterior probability) they receive. Arrow indicates inferred time to the most recent common ancestors (tMRCAs) of lineages or dates of major transmission events in 95% highest posterior density (HPD) intervals. Transmission events into the UK and continental Europe are labeled with asterisks and crosses respectively.



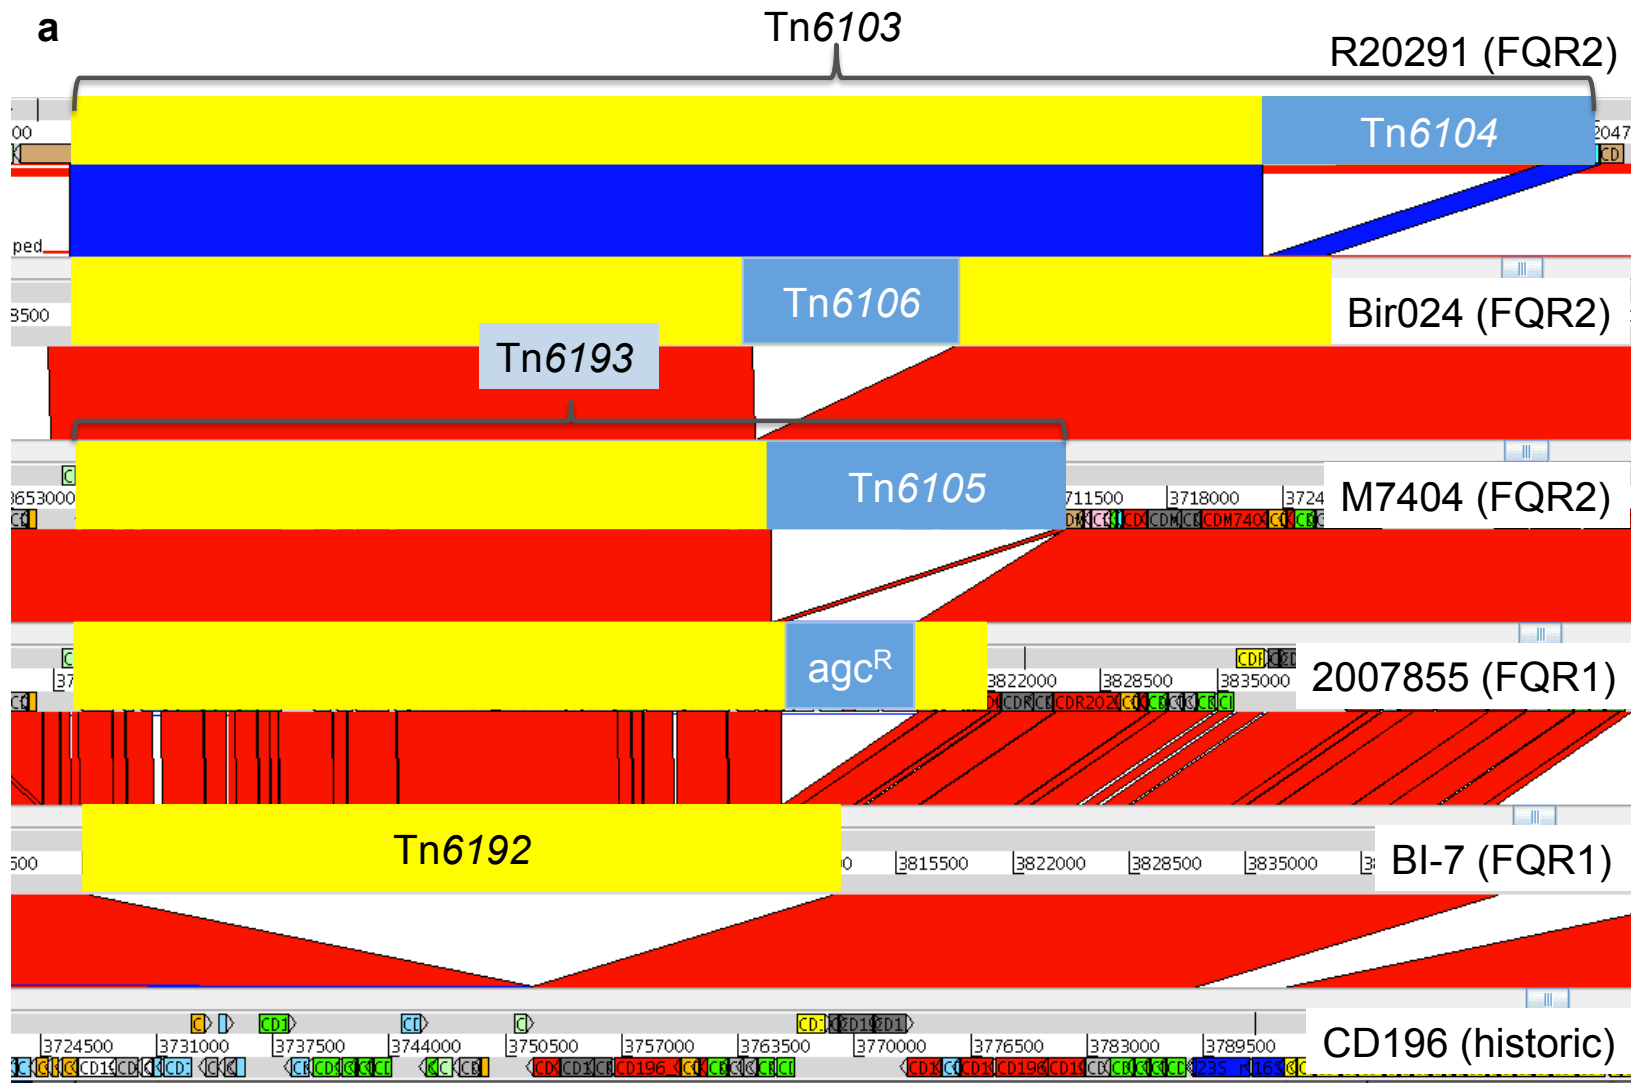

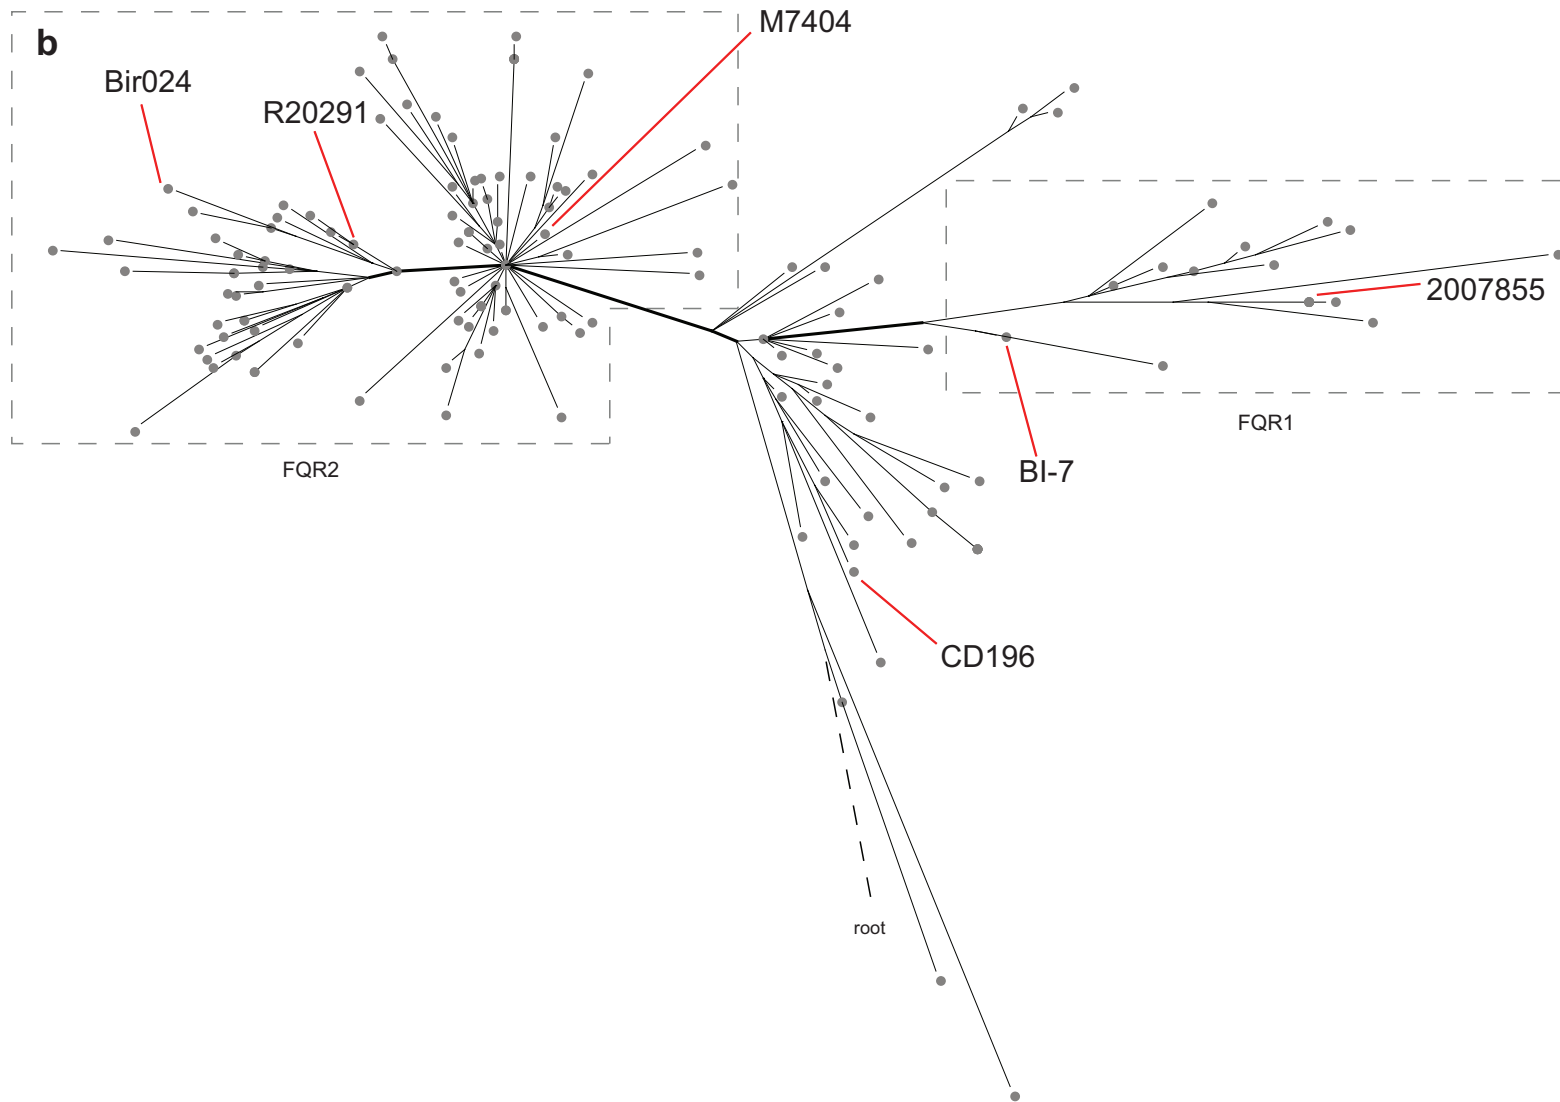

Supplementary Figure 6. Presence of five variants of CTn5-like element in the *C. difficile* 027/BI/NAP1 phylogeny. a) comparisons between CTn5-like elements in six representative *C. difficile* 027/BI/NAP1 genomes. The position and boundaries of each CTn5-like element or subsequent insertion are depicted by yellow or blue boxes, onto which the name of the element is labeled. The genome sequence is represented by a pair of thin grey rectangles (signifying both strands) and small colored boxes (coding sequences). The names of the isolates are given on the right, followed by brackets indicating lineage (FQR1, FQR2 or historic). Matching areas between sequences depict nucleotide similarity on the forward strand (red) or reverse strand (blue). b) positions of these six *C. difficile* 027/BI/NAP1 isolates (shown by red lines) in the same global phylogeny as Fig. 1a.

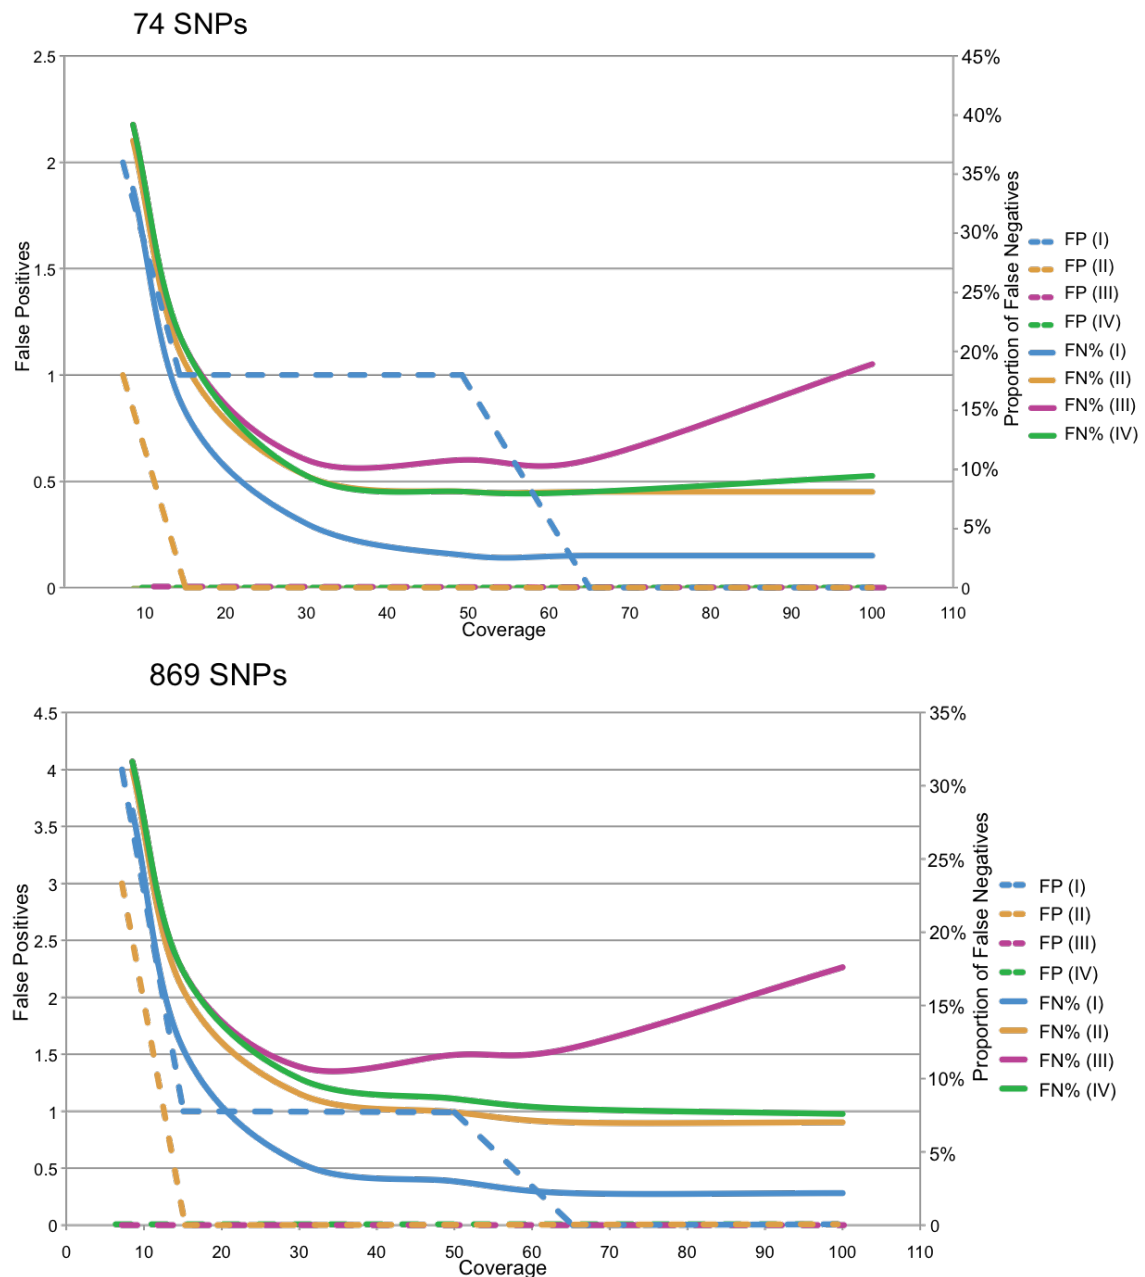

Supplementary Figure 7. Assessment of SNP detection accuracy. Numbers of false positive SNPs (dashed lines, left axis) and percentage of false negative SNPs (solid lines, right axis) are plotted in relation to sequencing data coverage (x-axis) and different SNP filtering and validation measures (colored lines). Scale 1 (top) and scale 2 (bottom) indicate two scenarios with different levels of divergence, as shown by the numbers of SNPs on top of each graph. SNP filtering and validation measures I – IV correspond to what stated in Supplementary Note.

61

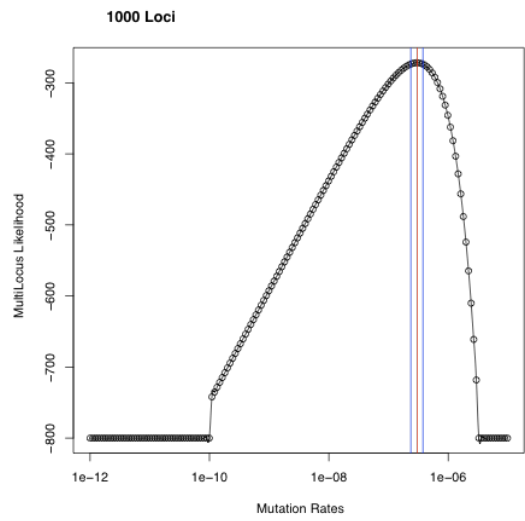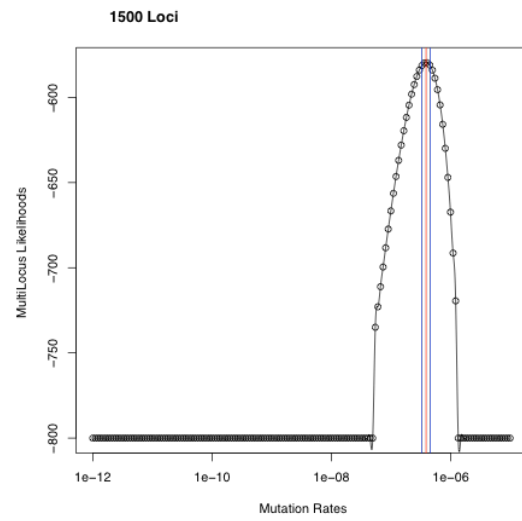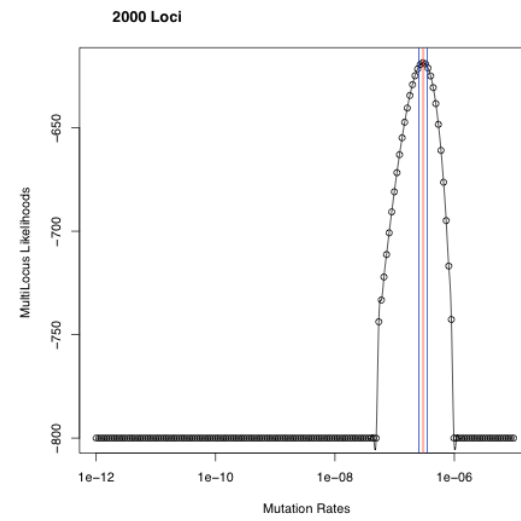

18

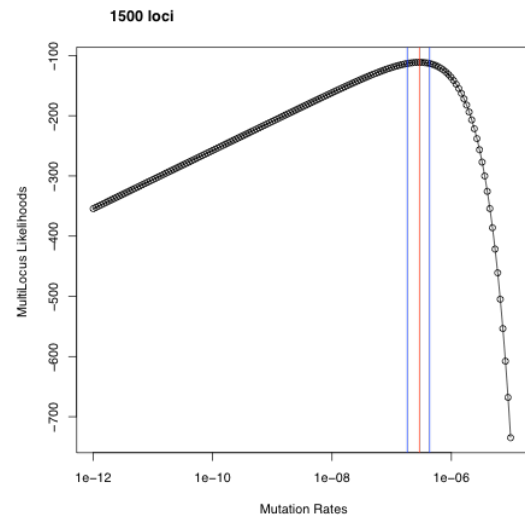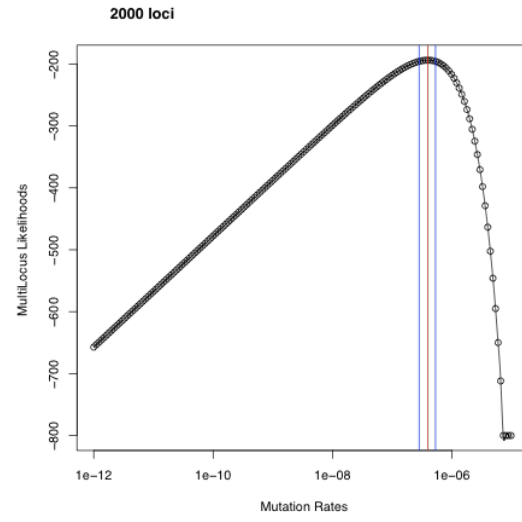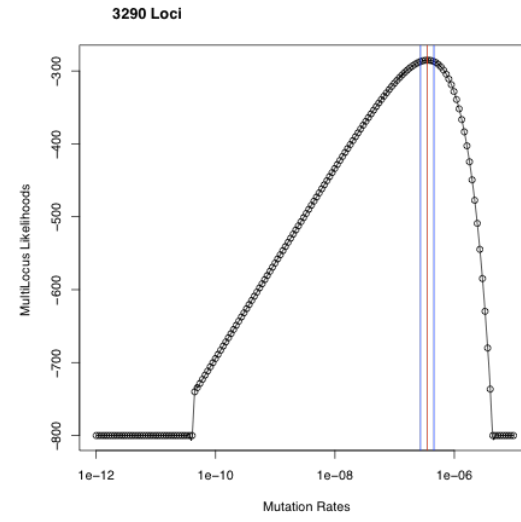

Supplementary Figure 8. Likelihood surfaces with exact binomial computation<sup>1</sup> of FQR2 expansion mutation rate estimates. Mutation rates were estimated using two collections consisting of either 61 (upper graphs) or 18 (lower graphs) isolates in the star-like phylogeny in the FQR2 lineage. The number of coding sequences used in each calculation is labeled on top of each graph.

Supplementary Table 1. Details of 151 *C. difficile* 027/BI/NAP1 isolates forming the global collection. Pink and blue shaded areas denote isolates from FQR1 and FQR2 lineages respectively. The un-colored boxes represent isolates forming the background from which FQR lineages emerged. Non-human isolates are indicated by strain names followed by “^” (animal sources) “\*” (food sources).

| Strain Name | Isolation Year | Isolation Place      | Other Name | Accession Number |
|-------------|----------------|----------------------|------------|------------------|
| Aus001      | 2010           | Melbourne, Australia | ES231      | ERS017078        |
| Aus002      | 2010           | Melbourne, Australia | ES232      | ERS017091        |
| Aus003      | 2010           | Melbourne, Australia | ES233      | ERS017092        |
| Aus004      | 2010           | Melbourne, Australia | ES235      | ERS017093        |
| Aus005      | 2010           | Melbourne, Australia | ES236      | ERS017094        |
| Aus006      | 2010           | Melbourne, Australia | ES238      | ERS017095        |
| BI-17       | 2004           | Montreal, Canada     | LSTM024    | ERS017255        |
| Can001      | 2001           | Calgary, Canada      | OB023      | ERS017144        |
| Can002      | 2001           | Calgary, Canada      | AO992      | ERS017145        |
| Can003      | 2001           | Calgary, Canada      | OB102      | ERS017146        |
| Can004      | 2001           | Calgary, Canada      | AO315      | ERS017147        |
| Can005      | 2002           | Calgary, Canada      | AO060      | ERS017148        |
| Can006      | 2002           | Calgary, Canada      | AO281      | ERS017149        |
| Can007      | 2002           | Calgary, Canada      | AO224      | ERS017150        |
| Can008      | 2003           | Calgary, Canada      | AO601      | ERS017151        |
| Can009      | 2003           | Montreal, Canada     | MTL047     | ERS017275        |
| Can010      | 2003           | Montreal, Canada     | MTL057     | ERS017153        |
| Can011      | 2003           | Calgary, Canada      | AO837      | ERS017154        |
| Can012      | 2003           | Montreal, Canada     | MTL077     | ERS017155        |
| M7404       | 2005           | Montreal, Canada     |            | ERS017219        |
| Lei001      | 2006           | Austria              |            | ERS032926        |
| Lei002      | 2005           | Belgium              |            | ERS032927        |
| Lei003      | 2006           | Belgium              |            | ERS032928        |
| Lei004      | 2009           | Finland              |            | ERS032929        |

|        |      |             |           |                    |
|--------|------|-------------|-----------|--------------------|
| Lei006 | 2007 | France      |           | ERS032930          |
| Lei007 | 2006 | Germany     |           | ERS032931          |
| Lei008 | 2008 | Germany     |           | ERS032932          |
| Lei011 | 2007 | Luxemburg   |           | ERS032935          |
| Lei012 | 2007 | Luxemburg   |           | ERS032936          |
| Lei013 | 2006 | Netherlands |           | ERS032938          |
| Lei014 | 2006 | Netherlands |           | ERS032939          |
| Lei015 | 2006 | Netherlands |           | ERS032940          |
| Lei016 | 2006 | Netherlands |           | ERS032941          |
| Lei017 | 2005 | Netherlands |           | ERS032942          |
| Lei018 | 2006 | Netherlands |           | ERS032943          |
| Lei019 | 2006 | Netherlands |           | ERS032944          |
| Lei020 | 2007 | Netherlands |           | ERS032945          |
| Lei021 | 2007 | Norway      |           | ERS032946          |
| Lei022 | 2009 | Poland      |           | ERS032947          |
| Lei023 | 2010 | Poland      |           | ERS032948          |
| Lei024 | 2008 | Switzerland |           | ERS032949          |
| Lei025 | 2007 | Switzerland |           | ERS032950          |
| Lei028 | 2008 | Netherlands |           | ERS032953          |
| Lei029 | 2009 | Netherlands |           | ERS032954          |
| Lei030 | 2010 | Netherlands |           | ERS032955          |
| Lei031 | 2007 | Netherlands |           | ERS032956          |
| Lei032 | 2005 | Netherlands |           | ERS032957          |
| CD196  | 1985 | France      |           | ERS017271/FN538970 |
| Lei036 | 2009 | Poland      |           | ERS032961          |
| Jap001 | 1997 | Japan       | JND-6-119 | ERS032963          |
| Jap002 | 2001 | Japan       | DJNS 5-23 | ERS032964          |
| Jap003 | 2001 | Japan       | JND 8-213 | ERS032965          |
| Jap004 | 2004 | Japan       | JND 8-064 | ERS032966          |
| Jap005 | 2004 | Japan       | JND 9-053 | ERS032967          |
| kor001 | 2006 | Korea       | Y11       | ERS017225          |



|         |      |                           |          |           |
|---------|------|---------------------------|----------|-----------|
| kor002  | 2007 | Korea                     | 512      | ERS017226 |
| kor003  | 2009 | Korea                     | Y93      | ERS017227 |
| kor004  | 2009 | Korea                     | 09-48    | ERS017228 |
| kor005  | 2010 | Korea                     | Y175     | ERS017229 |
| kor006  | 2010 | Korea                     | Y180     | ERS017230 |
| Sin001  | 2008 | Singapore                 | DA3689   | ERS012935 |
| Sin002  | 2009 | Singapore                 | DA1122   | ERS012936 |
| Sin003  | 2009 | Singapore                 | DA3115   | ERS012937 |
| Lei010  | 2008 | Ireland                   |          | ERS032934 |
| Lei009  | 2009 | Ireland                   |          | ERS032933 |
| Bel028  | 2009 | Belfast, Northern Ireland | CD090457 | ERS012944 |
| Bel032  | 2009 | Belfast, Northern Ireland | CD090156 | ERS012948 |
| Bel033  | 2010 | Belfast, Northern Ireland | CD100313 | ERS012949 |
| LSTM032 | 2008 | Ayrshire, UK              | BI-8     | ERS017264 |
| Bir012  | 2010 | Birmingham, UK            |          | ERS017109 |
| Bir014  | 2008 | Birmingham, UK            |          | ERS017111 |
| Bir024  | 2009 | Birmingham, UK            |          | ERS017122 |
| Bir025  | 2007 | Birmingham, UK            |          | ERS017123 |
| Cam010  | 2008 | Cambridge, UK             |          | ERS012970 |
| Cam011  | 2008 | Cambridge, UK             |          | ERS012971 |
| Cam019  | 2007 | Cambridge, UK             |          | ERS012980 |
| Cam020  | 2007 | Cambridge, UK             |          | ERS012981 |
| Cam032  | 2007 | Cambridge, UK             |          | ERS012993 |
| Cam037  | 2010 | Cambridge, UK             |          | ERS012998 |
| Exe003  | 2008 | Exeter, UK                |          | ERS017076 |
| Exe012  | 2007 | Exeter, UK                |          | ERS017085 |
| Exe013  | 2007 | Exeter, UK                |          | ERS017086 |
| Exe014  | 2008 | Exeter, UK                |          | ERS017087 |
| Exe015  | 2007 | Exeter, UK                |          | ERS017088 |
| Gla001  | 2007 | Glasgow, UK               |          | ERS008986 |
| Gla010  | 2008 | Glasgow, UK               |          | ERS008995 |

|         |      |                      |          |                    |
|---------|------|----------------------|----------|--------------------|
| Gla012  | 2009 | Glasgow, UK          |          | ERS008998          |
| Gla020  | 2009 | Glasgow, UK          |          | ERS009006          |
| ham001  | 2006 | London, UK           |          | ERS012950          |
| ham005  | 2007 | London, UK           |          | ERS012954          |
| ham006  | 2007 | London, UK           |          | ERS012955          |
| ham007  | 2007 | London, UK           |          | ERS012956          |
| ham009  | 2009 | London, UK           |          | ERS012958          |
| ham010  | 2008 | London, UK           |          | ERS012959          |
| ham011  | 2008 | London, UK           |          | ERS012960          |
| Liv059  | 2008 | Liverpool, UK        |          | ERS012883          |
| Liv1    | 2008 | Liverpool, UK        |          |                    |
| Liv100  | 2010 | Liverpool, UK        |          | ERS012926          |
| Liv180  | 2009 | Liverpool, UK        |          | ERS017194          |
| Liv188  | 2007 | Liverpool, UK        |          | ERS017203          |
| LSTM025 | 2007 | Dundee, UK           | 20070031 | ERS017257          |
| LSTM028 | 2008 | Edinburgh, UK        | 20080323 | ERS017260          |
| LSTM030 | 2008 | Inverness, UK        | 20080684 | ERS017262          |
| LSTM35  | 2006 | Nottingham, UK       |          | ERS017267          |
| LSTM36  | 2007 | Maidstone, UK        | DS902-06 | ERS017268          |
| R20291  | 2006 | Stoke Mandeville, UK |          | ERS032962/FN545816 |
| Wal001  | 2002 | Birmingham, UK       | R16760   | ERS017096          |
| Wal002  | 1998 | Preston, UK          | R12628   | ERS017097          |
| 2004013 | 2004 | Maine, USA           |          | ERS004201          |
| 2004102 | 2004 | New Jersey, USA      |          | ERS004208          |
| 2004118 | 2004 | Maine, USA           |          | ERS004209          |
| 2004163 | 2004 | Pennsylvania, USA    |          | ERS004210          |
| 2006439 | 2006 | Arizona, USA         |          | ERS004207          |
| 2007140 | 2007 | Maryland, USA        |          | ERS004205          |
| 2007218 | 2007 | USA                  |          | ERS004214          |
| 2007825 | 2007 | USA                  |          | ERS004204          |
| 2007833 | 2007 | Arizona, USA         |          | ERS004212          |

|           |      |                               |         |                    |
|-----------|------|-------------------------------|---------|--------------------|
| 2007837   | 2007 | USA                           |         | ERS004206          |
| 2007850   | 2007 | USA                           |         | ERS001492          |
| 2007855 ^ | 2007 | USA                           |         | FN665654           |
| 2007221 * | 2007 | Arizona, USA                  |         | ERS004211          |
| 2007223 * | 2007 | Arizona, USA                  |         | ERS001491          |
| BI-1      | 1988 | Minneapolis, Minnesota, USA   | LSTM021 | ERS017252/FN668941 |
| BI-10     | 2001 | Pittsburgh, Pennsylvania, USA |         | ERS017143          |
| BI-11     | 2001 | Pittsburgh, Pennsylvania, USA |         | ERS003831          |
| BI-12     | 2004 | Camp Hill, Pennsylvania, USA  | LSTM023 | ERS017254          |
| BI-13     | 2004 | New Jersey, USA               |         | ERS003836          |
| BI-15     | 2004 | New Jersey, USA               |         | ERS003835          |
| BI-2      | 1991 | Tuscon, Arizona, USA          |         | ERS017141          |
| BI-3      | 1990 | Minneapolis, Minnesota, USA   |         | ERS017142          |
| BI-4      | 1993 | Minneapolis, Minnesota, USA   |         | ERS003827          |
| BI-5      | 1995 | Albany, New York, USA         |         | ERS003828          |
| BI-6      | 2003 | Portland, Oregon, USA         |         | ERS003833          |
| BI-6p     | 2004 | Atlanta, Georgia, USA         |         | ERS003829          |
| BI-7      | 2003 | Portland, Oregon, USA         | LSTM022 | ERS017253          |
| BI-8      | 2004 | Portland, Maine, USA          |         | ERS003834          |
| 2004101   | 2004 | Maine, USA                    | LSTM001 | ERS017231          |
| 2005079   | 2005 | Pennsylvania, USA             | LSTM002 | ERS017232          |
| 2006237 ^ | 2006 | Arizona, USA                  | LSTM003 | ERS017233          |
| 2007014   | 2007 | Connecticut, USA              | LSTM004 | ERS017234          |
| 2007042 * | 2007 | Arizona, USA                  | LSTM005 | ERS017235          |
| 2007043 * | 2007 | Arizona, USA                  | LSTM006 | ERS017236          |
| 2007053   | 2007 | Tennessee, USA                | LSTM007 | ERS017238          |
| 2007222 * | 2007 | Arizona, USA                  | LSTM009 | ERS017240          |
| 2007235 * | 2007 | Arizona, USA                  | LSTM011 | ERS017241          |
| 2007616 * | 2007 | Arizona, USA                  | LSTM012 | ERS017242          |

|         |      |     |         |           |
|---------|------|-----|---------|-----------|
| 2007828 | 2007 | USA | LSTM013 | ERS017243 |
| 2007832 | 2007 | USA | LSTM014 | ERS017244 |
| 2007839 | 2007 | USA | LSTM016 | ERS017247 |
| 2007850 | 2007 | USA | LSTM019 | ERS017250 |
| 2007851 | 2007 | USA | LSTM020 | ERS017251 |

Supplementary Table 2. Estimates of mutation rate of FQR2 star-like phylogeny with a rapid expansion model<sup>1</sup>. Lower and upper refer to the 95% lower and upper boundaries for the mutation estimates in the likelihood distribution (Supplementary Fig. 8).

| <b>NumStrain</b> | <b>NumLoci</b> | <b>Rate</b> | <b>Lower</b> | <b>Upper</b> | <b>NumSNPs</b> |
|------------------|----------------|-------------|--------------|--------------|----------------|
| 61               | 1000           | 3.02E-07    | 2.36E-07     | 3.76E-07     | 168            |
| 61               | 1500           | 3.84E-07    | 3.24E-07     | 4.50E-07     | 168            |
| 61               | 2000           | 2.99E-07    | 2.55E-07     | 3.51E-07     | 168            |
| 18               | 1500           | 2.91E-07    | 1.82E-07     | 4.33E-07     | 66             |
| 18               | 2000           | 3.96E-07    | 2.82E-07     | 5.33E-07     | 66             |
| 18               | 3290           | 3.55E-07    | 2.71E-07     | 4.55E-07     | 66             |

Supplementary Table 3. Details of 188 *C. difficile* 027/BI/NAP1 isolates forming the UK national collection.

| <b>Strain Name</b> | <b>Isolation Year</b> | <b>Isolation Place</b> | <b>Other Name</b> | <b>Accession Number</b> |
|--------------------|-----------------------|------------------------|-------------------|-------------------------|
| Bel023             | 2009                  | Belfast                | CD090444          | ERS012938               |
| Bel024             | 2009                  | Belfast                | CD090028          | ERS012939               |
| Bel026             | 2009                  | Belfast                | CD090387          | ERS012942               |
| Bel027             | 2009                  | Belfast                | CD090480          | ERS012943               |
| Bel028             | 2009                  | Belfast                | CD090457          | ERS012944               |
| Bel029             | 2009                  | Belfast                | CD090095          | ERS012945               |
| Bel030             | 2009                  | Belfast                | CD090511          | ERS012946               |
| Bel031             | 2009                  | Belfast                | CD090271          | ERS012947               |
| Bel032             | 2009                  | Belfast                | CD090156          | ERS012948               |
| Bel033             | 2010                  | Belfast                | CD100313          | ERS012949               |
| Bel025             |                       | Belfast                | CD100056          | ERS012940               |
| Wal001             | 2002                  | Birmingham             | R16760            | ERS017096               |
| Bir001             | 2007                  | Birmingham             |                   | ERS017079               |
| Bir007             | 2007                  | Birmingham             |                   | ERS017104               |
| Bir009             | 2007                  | Birmingham             |                   | ERS017106               |
| Bir013             | 2007                  | Birmingham             |                   | ERS017110               |
| Bir015             | 2007                  | Birmingham             |                   | ERS017112               |
| Bir017             | 2007                  | Birmingham             |                   | ERS017115               |
| Bir018             | 2007                  | Birmingham             |                   | ERS017116               |
| Bir019             | 2007                  | Birmingham             |                   | ERS017117               |
| Bir021             | 2007                  | Birmingham             |                   | ERS017119               |
| Bir023             | 2007                  | Birmingham             |                   | ERS017121               |
| Bir025             | 2007                  | Birmingham             |                   | ERS017123               |
| Bir027             | 2007                  | Birmingham             |                   | ERS017125               |
| Bir029             | 2007                  | Birmingham             |                   | ERS017128               |
| Bir003             | 2008                  | Birmingham             |                   | ERS017099               |
| Bir005             | 2008                  | Birmingham             |                   | ERS017102               |
| Bir006             | 2008                  | Birmingham             |                   | ERS017103               |
| Bir011             | 2008                  | Birmingham             |                   | ERS017108               |
| Bir014             | 2008                  | Birmingham             |                   | ERS017111               |
| Bir030             | 2008                  | Birmingham             |                   | ERS017129               |
| Bir031             | 2008                  | Birmingham             |                   | ERS017130               |
| Bir032             | 2008                  | Birmingham             |                   | ERS017131               |
| Bir033             | 2008                  | Birmingham             |                   | ERS017132               |
| Bir034             | 2008                  | Birmingham             |                   | ERS017133               |
| Bir035             | 2008                  | Birmingham             |                   | ERS017134               |
| Bir036             | 2008                  | Birmingham             |                   | ERS017135               |
| Bir037             | 2008                  | Birmingham             |                   | ERS017136               |
| Bir038             | 2008                  | Birmingham             |                   | ERS017137               |
| Bir039             | 2008                  | Birmingham             |                   | ERS017138               |
| Bir010             | 2009                  | Birmingham             |                   | ERS017107               |
| Bir024             | 2009                  | Birmingham             |                   | ERS017122               |
| Bir028             | 2009                  | Birmingham             |                   | ERS017127               |
| Bir002             | 2010                  | Birmingham             |                   | ERS017098               |
| Bir004             | 2010                  | Birmingham             |                   | ERS017101               |
| Bir008             | 2010                  | Birmingham             |                   | ERS017105               |
| Bir012             | 2010                  | Birmingham             |                   | ERS017109               |
| Bir016             | 2010                  | Birmingham             |                   | ERS017114               |

|        |      |            |                |           |
|--------|------|------------|----------------|-----------|
| Bir020 | 2010 | Birmingham |                | ERS017118 |
| Bir022 | 2010 | Birmingham |                | ERS017120 |
| Bir026 | 2010 | Birmingham |                | ERS017124 |
| Cam001 | 2008 | Cambridge  | L,08.7605514.Y | ERS012961 |
| Cam002 | 2008 | Cambridge  | L,08.7605513.E | ERS012962 |
| Cam003 | 2008 | Cambridge  | L,08.7612367.D | ERS012963 |
| Cam004 | 2008 | Cambridge  | L,08.7604515.S | ERS012964 |
| Cam005 | 2008 | Cambridge  | L,08.7604867.M | ERS012965 |
| Cam006 | 2008 | Cambridge  | L,08.7604518.H | ERS012966 |
| Cam007 | 2008 | Cambridge  | L,08.7604292.G | ERS012967 |
| Cam008 | 2008 | Cambridge  | L,09.7720057.L | ERS012968 |
| Cam009 | 2008 | Cambridge  | L,09.7720055.B | ERS012969 |
| Cam010 | 2008 | Cambridge  | L,08.7612770.M | ERS012970 |
| Cam011 | 2008 | Cambridge  | L,08.7612904.H | ERS012971 |
| Cam012 | 2008 | Cambridge  | L,08.7612907.C | ERS012972 |
| Cam013 | 2008 | Cambridge  | L,08.7612906.A | ERS012973 |
| Cam014 | 2008 | Cambridge  | L,08.7612694.Z | ERS012974 |
| Cam015 | 2008 | Cambridge  | L,08.7612621.Q | ERS012975 |
| Cam016 | 2008 | Cambridge  | L,08.7603905.D | ERS012976 |
| Cam017 | 2007 | Cambridge  | L,08.7597036.J | ERS012978 |
| Cam018 | 2007 | Cambridge  | L,08.7597110.Z | ERS012979 |
| Cam019 | 2007 | Cambridge  | L,07.7272911.Y | ERS012980 |
| Cam020 | 2007 | Cambridge  | L,07.7271951.S | ERS012981 |
| Cam021 | 2007 | Cambridge  | L,07.7272912.P | ERS012982 |
| Cam022 | 2007 | Cambridge  | L,07.7272687.K | ERS012983 |
| Cam023 | 2007 | Cambridge  | L,07.7272910.E | ERS012984 |
| Cam024 | 2007 | Cambridge  | L,07.7272685.A | ERS012985 |
| Cam025 | 2007 | Cambridge  | L,07.7272686.C | ERS012986 |
| Cam026 | 2007 | Cambridge  | L,07.7272608.C | ERS012987 |
| Cam027 | 2007 | Cambridge  | L,07.7272609.K | ERS012988 |
| Cam028 | 2007 | Cambridge  | L,07.7272610.W | ERS012989 |
| Cam029 | 2007 | Cambridge  | L,07.7272611.A | ERS012990 |
| Cam030 | 2007 | Cambridge  | L,07.7272605.H | ERS012991 |
| Cam031 | 2007 | Cambridge  | L,07.7272607.A | ERS012992 |
| Cam032 | 2007 | Cambridge  | L,07.7270069.E | ERS012993 |
| Cam033 | 2007 | Cambridge  | L,07.7271955.W | ERS012994 |
| Cam034 | 2007 | Cambridge  | L,07.7270061.C | ERS012995 |
| Cam035 | 2007 | Cambridge  | L,07.7270314.G | ERS012996 |
| Cam036 | 2009 | Cambridge  |                | ERS012997 |
| Cam037 | 2010 | Cambridge  |                | ERS012998 |
| Cam038 | 2010 | Cambridge  |                | ERS012999 |
| Cam039 | 2010 | Cambridge  |                | ERS013000 |
| Exe001 | 2007 | Exeter     | FA0710129      | ERS017074 |
| Exe002 | 2007 | Exeter     | FA07011764     | ERS017075 |
| Exe004 | 2007 | Exeter     | FA07001994     | ERS017080 |
| Exe005 | 2007 | Exeter     | FA07003754     | ERS017081 |
| Exe006 | 2007 | Exeter     | FA07004642     | ERS017082 |
| Exe009 | 2007 | Exeter     | FA0700757      | ERS017083 |
| Exe010 | 2007 | Exeter     | FA07008773     | ERS017077 |
| Exe011 | 2007 | Exeter     | FA07004630     | ERS017084 |
| Exe012 | 2007 | Exeter     | FA07006324     | ERS017085 |
| Exe013 | 2007 | Exeter     | FA07008357     | ERS017086 |
| Exe015 | 2007 | Exeter     | FA07011040     | ERS017088 |

|        |      |           |            |           |
|--------|------|-----------|------------|-----------|
| Exe003 | 2008 | Exeter    | FA08003371 | ERS017076 |
| Exe014 | 2008 | Exeter    | FA08002245 | ERS017087 |
| Liv188 | 2007 | Liverpool |            | ERS017203 |
| Liv189 | 2007 | Liverpool |            | ERS017204 |
| Liv190 | 2007 | Liverpool |            | ERS017205 |
| Liv062 | 2008 | Liverpool | 98014      | ERS012886 |
| Liv083 | 2008 | Liverpool | 98038      | ERS012908 |
| Liv056 | 2008 | Liverpool | 98006      | ERS012880 |
| Liv081 | 2008 | Liverpool | 98331      | ERS012906 |
| Liv020 | 2009 | Liverpool | 98076      | ERS017217 |
| Liv053 | 2008 | Liverpool | 98034      | ERS012877 |
| Liv055 | 2008 | Liverpool | 98043      | ERS012879 |
| Liv057 | 2008 | Liverpool | 98007      | ERS012881 |
| Liv059 | 2008 | Liverpool | 98009      | ERS012883 |
| Liv061 | 2008 | Liverpool | 98010      | ERS012885 |
| Liv086 | 2009 | Liverpool | 98333      | ERS012911 |
| Liv096 | 2009 | Liverpool | 98350      | ERS012922 |
| Liv097 | 2009 | Liverpool | 98420      | ERS012923 |
| Liv1   | 2008 | Liverpool | 98011      | ERS124182 |
| Liv100 | 2010 | Liverpool | 108042     | ERS012926 |
| Liv101 | 2010 | Liverpool | 108056     | ERS012927 |
| Liv102 | 2010 | Liverpool | 108087     | ERS012928 |
| Liv103 | 2010 | Liverpool | 108059     | ERS012929 |
| Liv104 | 2010 | Liverpool | 108075     | ERS012930 |
| Liv10  | 2009 | Liverpool | 98237      | ERS017274 |
| Liv11  | 2008 | Liverpool | 98037      | ERS124194 |
| Liv127 | 2010 | Liverpool | 108121     | ERS012931 |
| Liv131 | 2010 | Liverpool | 108127     | ERS012932 |
| Liv132 | 2010 | Liverpool | 108061     | ERS012933 |
| Liv136 | 2010 | Liverpool | 108129     | ERS012934 |
| Liv15  | 2009 | Liverpool | 98276      | ERS124201 |
| Liv180 | 2009 | Liverpool | 98338      | ERS017194 |
| Liv182 | 2009 | Liverpool | 98273      | ERS017196 |
| Liv184 | 2009 | Liverpool | 98098      | ERS017198 |
| Liv186 | 2009 | Liverpool | 98152      | ERS017201 |
| Liv3   | 2009 | Liverpool | 98016      | ERS017272 |
| Liv41  | 2009 | Liverpool | 98580      | ERS012869 |
| CD679  | 2009 | London    |            | ERS012925 |
| ham001 | 2006 | London    | 31H        | ERS012950 |
| ham002 | 2007 | London    | 133H       | ERS012951 |
| ham003 | 2009 | London    | 332H       | ERS012952 |
| ham004 | 2007 | London    | 97C        | ERS012953 |
| ham005 | 2007 | London    | 44C        | ERS012954 |
| ham006 | 2007 | London    | 53C        | ERS012955 |
| ham007 | 2007 | London    | 101C       | ERS012956 |
| ham009 | 2009 | London    | 217C       | ERS012958 |
| ham010 | 2008 | London    | 211H       | ERS012959 |
| ham011 | 2008 | London    | 164C       | ERS012960 |
| lon001 |      | London    | CD676 II   | ERS013001 |
| lon004 |      | London    | CD630      | ERS013005 |
| lon005 |      | London    | CD682      | ERS013006 |
| lon006 |      | London    | CD683      | ERS013007 |
| LSTM36 |      | Maidstone | DS902-06   | ERS017268 |



|         |      |                  |          |                    |
|---------|------|------------------|----------|--------------------|
| LSTM35  | 2006 | Nottingham       |          | ERS017267          |
| Wal002  | 1998 | Preston          | R12628   | ERS017097          |
| LSTM032 | 2008 | Ayrshire         | BI-8     | ERS017264          |
| Gla001  | 2007 | Glasgow          |          | ERS008986          |
| LSTM025 | 2007 | Dundee           | 20070031 | ERS017257          |
| LSTM026 | 2008 | Dumfries         | 20080107 | ERS017258          |
| LSTM027 | 2008 | Ayrshire         | 20080195 | ERS017259          |
| LSTM028 | 2008 | Edinburgh        | 20080323 | ERS017260          |
| LSTM029 | 2008 | Dumbarton        | 20080533 | ERS017261          |
| Gla002  | 2008 | Glasgow          |          | ERS008987          |
| Gla003  | 2008 | Glasgow          |          | ERS008988          |
| Gla004  | 2008 | Glasgow          |          | ERS008989          |
| Gla005  | 2008 | Glasgow          |          | ERS008990          |
| Gla006  | 2008 | Glasgow          |          | ERS008991          |
| Gla007  | 2008 | Glasgow          |          | ERS008992          |
| Gla008  | 2008 | Glasgow          |          | ERS008993          |
| Gla009  | 2008 | Glasgow          |          | ERS008994          |
| Gla010  | 2008 | Glasgow          |          | ERS008995          |
| LSTM030 | 2008 | Inverness        | 20080684 | ERS017262          |
| Gla012  | 2009 | Glasgow          |          | ERS008998          |
| Gla013  | 2009 | Glasgow          |          | ERS008999          |
| Gla014  | 2009 | Glasgow          |          | ERS009000          |
| Gla015  | 2009 | Glasgow          |          | ERS009001          |
| Gla016  | 2009 | Glasgow          |          | ERS009002          |
| Gla017  | 2009 | Glasgow          |          | ERS009003          |
| Gla018  | 2009 | Glasgow          |          | ERS009004          |
| Gla019  | 2009 | Glasgow          |          | ERS009005          |
| Gla020  | 2009 | Glasgow          |          | ERS009006          |
| Gla021  | 2009 | Glasgow          |          | ERS009007          |
| Gla022  | 2009 | Glasgow          |          | ERS009008          |
| Lei027  | 2009 | Glasgow<br>Stoke |          | ERS032952          |
| R20291  | 2005 | Mandeville       |          | ERS032962/FN545816 |
| LSTM031 | 2008 | Glasgow          | 20080783 | ERS017263          |
| Lei026  | 2006 | UK               |          | ERS032951          |

Supplementary Table 4. Discriminatory SNPs and predicted functional impact within the *C. difficile* 027/BI/NAP1 lineage. Position and reference residue refer to those in R20291. Branches A-E correspond to the branches labeled in Supplementary Fig. 3. nonsyn – nonsynonymous.

| Position | Branch | Type       | Product                                                                                 | Reference residue | Alternative residue | Amino acid change | Predicted impact                                                  |
|----------|--------|------------|-----------------------------------------------------------------------------------------|-------------------|---------------------|-------------------|-------------------------------------------------------------------|
| 2656051  | B      | Nonsyn     | quinolinate synthetase A                                                                | L                 | I                   | conservative      | None                                                              |
| 6310     | A, C   | Nonsyn     | DNA gyrase subunit A                                                                    | I                 | T                   |                   | Fluoroquinolone resistance                                        |
| 118571   | C      | Nonsyn     | putative ribosomal protein                                                              | D                 | N                   | conservative      | None                                                              |
| 1239212  | C      | Nonsyn     | conserved hypothetical protein, DUF_177 family                                          | T                 | N                   | conservative      | None                                                              |
| 1466990  | C      | Nonsyn     | Probable cation transporter, Nramp homolog                                              | D                 | A                   | non-conservative  | Possible transmembrane helix disruption                           |
| 2938388  | C      | Nonsyn     | hypothetical protein (Small, very Histidine-rich protein, unique to <i>Clostridia</i> ) | F                 | L                   | non-conservative  | Unknown                                                           |
| 3118366  | C      | synonymous | phosphoenolpyruvate-protein phosphotransferase                                          | P                 | P                   | none              | None                                                              |
| 3507157  | C      | Intergenic |                                                                                         |                   |                     | none              | 200 bp upstream of conserved hypothetical protein                 |
| 120932   | D      | synonymous | DNA-directed RNA polymerase alpha chain                                                 | I                 | I                   |                   |                                                                   |
| 2304160  | D      | Nonsyn     | conserved hypothetical protein, DUF162 family                                           | E                 | G                   | non-conservative  | Unknown                                                           |
| 2983263  | D      | Nonsyn     | UDP-N-acetylmuramoylalanine--D-glutamate ligase                                         | T                 | I                   | non-conservative  | Unknown; not within any Pfam domain                               |
| 3538081  | D      | Nonsyn     | PTS system, Ilabc component                                                             | V                 | I                   | conservative      | None                                                              |
| 886105   | E      | Nonsyn     | penicillin-binding protein                                                              | T                 | I                   | non-conservative  | Transpeptidase, could potentially result in penicillin resistance |
| 2575047  | A      | Nonsyn     | hypothetical protein                                                                    | V                 | I                   | conservative      | Unknown                                                           |
| 2948945  | A      | Intergenic |                                                                                         |                   |                     | none              | 60 bp upstream of a putative membrane protein                     |

Supplementary Table 5. Coding sequences carried by CTn5-like elements Tn6192 and Tn6105 in *C. difficile* 027/BI/NAP1 FQR1 and FQR2 lineages. Coding sequence corresponds to that in isolate R20291.

| <b>Coding sequence</b> | <b>Product</b>                                                 | <b>Transposon</b> |
|------------------------|----------------------------------------------------------------|-------------------|
| CDR20291_1789          | putative conjugative transposon membrane protein               | Tn6192            |
| CDR20291_1790          | putative conjugal transfer protein                             | Tn6192            |
| CDR20291_1791          | conserved hypothetical protein                                 | Tn6192            |
| CDR20291_1792          | putative cell surface protein                                  | Tn6192            |
| CDR20291_1793          | putative DNA topoisomerase                                     | Tn6192            |
| CDR20291_1794          | putative uncharacterized protein                               | Tn6192            |
| CDR20291_1795          | putative helicase                                              | Tn6192            |
| CDR20291_1796          | putative uncharacterized protein                               | Tn6192            |
| CDR20291_1797          | putative conjugative transposon DNA recombination protein      | Tn6192            |
| CDR20291_1798          | putative conjugative transposon conserved hypothetical protein | Tn6192            |
| CDR20291_1799          | putative uncharacterized protein                               | Tn6192            |
| CDR20291_1800          | putative conjugative transposon mobilization protein           | Tn6192            |
| CDR20291_1801          | putative exported protein                                      | Tn6192            |
| CDR20291_1802          | putative iron-sulfur-binding membrane protein                  | Tn6192            |
| CDR20291_1803          | ABC transporter, permease protein                              | Tn6192            |
| CDR20291_1804          | abc transporter, atp-binding protein                           | Tn6192            |
| CDR20291_1805          | ABC transporter, permease protein                              | Tn6192            |
| CDR20291_1806          | two-component system, response regulator                       | Tn6192            |
| CDR20291_1807          | two-component system, sensor protein                           | Tn6192            |
| CDR20291_1808          | probable transcription regulator                               | Tn6192            |
| CDR20291_1809          | site-specific recombinase                                      | Tn6192            |
| CDR20291_1765          | conserved hypothetical protein                                 | Tn6105            |
| CDR20291_1766          | probable transcription regulator (contains HtH domain)         | Tn6105            |
| CDR20291_1767          | conserved hypothetical protein                                 | Tn6105            |
| CDR20291_1767A         | conserved hypothetical protein                                 | Tn6105            |

|                |                                                            |        |
|----------------|------------------------------------------------------------|--------|
| CDR20291_1768  | putative plasmid mobilisation protein                      | Tn6105 |
| CDR20291_1769  | putative DNA-binding protein (contains zinc-finger domain) | Tn6105 |
| CDR20291_1770  | putative P-loop NTPase                                     | Tn6105 |
| CDR20291_1771  | site-specific recombinase                                  | Tn6105 |
| CDR20291_1771A | hypothetical protein                                       | Tn6105 |
| CDR20291_1772  | site-specific recombinase                                  | Tn6105 |
| CDR20291_1773  | probable regulator (contains HtH domain from sigma 70)     | Tn6105 |
| CDR20291_1774  | radical SAM enzyme                                         | Tn6105 |
| CDR20291_1775  | two-component system regulatory protein                    | Tn6105 |
| CDR20291_1775A | conserved hypothetical protein                             | Tn6105 |

---

Supplementary Table 6. Mobile elements carried by *C. difficile* 027/BI/NAP1 isolates. The presence of an element in a strain is depicted by a tick in the corresponding box.

| Strain Name | Other Name | Lineage | CTn1-like | CTn5-like |        |        |        |                  |        | phi-027 |
|-------------|------------|---------|-----------|-----------|--------|--------|--------|------------------|--------|---------|
|             |            |         |           | Tn6192    | Tn6105 | Tn6106 | Tn6104 | agc <sup>R</sup> | Tn6194 |         |
| 2004102     |            | FQR1    | √         | √         |        |        |        | √                | √      | √       |
| 2005079     | LSTM002    | FQR1    | √         | √         |        |        |        |                  | √      | √       |
| 2006439     |            | FQR1    | √         | √         |        |        |        | √                | √      | √       |
| 2007042     | LSTM005    | FQR1    | √         | √         |        |        |        | √                | √      | √       |
| 2007043     | LSTM006    | FQR1    | √         | √         |        |        |        | √                | √      | √       |
| 2007140     |            | FQR1    | √         | √         |        |        |        |                  | √      | √       |
| 2007855     |            | FQR1    | √         | √         |        |        |        | √                | √      | √       |
| BI-10       |            | FQR1    | √         | √         |        |        |        |                  | √      | √       |
| BI-13       |            | FQR1    | √         | √         |        |        |        | √                | √      | √       |
| BI-15       |            | FQR1    | √         | √         |        |        |        | √                | √      | √       |
| BI-6        |            | FQR1    | √         | √         |        |        |        |                  | √      | √       |
| BI-7        | LSTM022    | FQR1    | √         | √         |        |        |        |                  |        | √       |
| kor002      | 512        | FQR1    | √         | √         |        |        |        |                  | √      | √       |
| kor003      | Y93        | FQR1    | √         | √         |        |        |        |                  | √      | √       |
| kor004      | 09-48      | FQR1    | √         | √         |        |        |        |                  | √      | √       |
| kor005      | Y175       | FQR1    | √         | √         |        |        |        |                  | √      | √       |
| kor006      | Y180       | FQR1    | √         | √         |        |        |        |                  | √      | √       |
| Lei025      |            | FQR1    | √         | √         | √      |        |        |                  |        | √       |
| 2004013     |            | FQR2    | √         | √         | √      |        |        |                  |        | √       |
| 2004101     | LSTM001    | FQR2    | √         | √         | √      |        |        |                  |        | √       |
| 2004118     |            | FQR2    | √         | √         | √      |        |        |                  |        | √       |
| 2004163     |            | FQR2    | √         | √         | √      |        |        |                  |        | √       |
| 2007014     | LSTM004    | FQR2    | √         | √         | √      |        |        |                  |        | √       |
| 2007053     | LSTM007    | FQR2    | √         | √         | √      |        |        |                  |        | √       |
| 2007825     |            | FQR2    | √         | √         | √      |        |        |                  |        | √       |

|         |          |      |   |   |   |  |  |  |  |   |
|---------|----------|------|---|---|---|--|--|--|--|---|
| 2007833 |          | FQR2 | √ | √ | √ |  |  |  |  | √ |
| 2007837 |          | FQR2 | √ | √ | √ |  |  |  |  | √ |
| 2007839 | LSTM016  | FQR2 | √ | √ | √ |  |  |  |  | √ |
| 2007850 |          | FQR2 | √ | √ | √ |  |  |  |  | √ |
| 2007850 | LSTM019  | FQR2 | √ | √ | √ |  |  |  |  | √ |
| 2007851 | LSTM020  | FQR2 | √ | √ | √ |  |  |  |  | √ |
| Aus001  | ES231    | FQR2 | √ | √ | √ |  |  |  |  | √ |
| Aus002  | ES232    | FQR2 | √ | √ | √ |  |  |  |  | √ |
| Aus003  | ES233    | FQR2 | √ | √ | √ |  |  |  |  | √ |
| Aus004  | ES235    | FQR2 | √ | √ | √ |  |  |  |  | √ |
| Aus005  | ES236    | FQR2 | √ | √ | √ |  |  |  |  | √ |
| Aus006  | ES238    | FQR2 | √ | √ | √ |  |  |  |  | √ |
| Bel023  | CD090444 | FQR2 | √ | √ | √ |  |  |  |  | √ |
| Bel024  | CD090028 | FQR2 | √ | √ | √ |  |  |  |  | √ |
| Bel025  | CD100056 | FQR2 | √ | √ | √ |  |  |  |  | √ |
| Bel026  | CD090387 | FQR2 | √ | √ | √ |  |  |  |  | √ |
| Bel027  | CD090480 | FQR2 | √ | √ | √ |  |  |  |  | √ |
| Bel028  | CD090457 | FQR2 | √ | √ | √ |  |  |  |  | √ |
| Bel029  | CD090095 | FQR2 | √ | √ | √ |  |  |  |  | √ |
| Bel030  | CD090511 | FQR2 | √ | √ | √ |  |  |  |  | √ |
| Bel031  | CD090271 | FQR2 | √ | √ | √ |  |  |  |  | √ |
| Bel032  | CD090156 | FQR2 | √ | √ | √ |  |  |  |  | √ |
| Bel033  | CD100313 | FQR2 | √ | √ | √ |  |  |  |  | √ |
| BI-12   | LSTM023  | FQR2 | √ | √ | √ |  |  |  |  | √ |
| BI-17   | LSTM024  | FQR2 | √ | √ | √ |  |  |  |  | √ |
| BI-6p   |          | FQR2 | √ | √ | √ |  |  |  |  | √ |
| Bir001  |          | FQR2 | √ | √ | √ |  |  |  |  | √ |
| Bir002  |          | FQR2 | √ | √ | √ |  |  |  |  | √ |
| Bir003  |          | FQR2 | √ | √ | √ |  |  |  |  | √ |
| Bir004  |          | FQR2 | √ | √ | √ |  |  |  |  | √ |
| Bir005  |          | FQR2 | √ | √ | √ |  |  |  |  | √ |

|        |  |      |   |   |   |  |   |  |  |   |
|--------|--|------|---|---|---|--|---|--|--|---|
| Bir006 |  | FQR2 | √ | √ | √ |  |   |  |  | √ |
| Bir007 |  | FQR2 | √ | √ | √ |  |   |  |  | √ |
| Bir008 |  | FQR2 | √ | √ | √ |  |   |  |  | √ |
| Bir009 |  | FQR2 | √ | √ | √ |  |   |  |  | √ |
| Bir010 |  | FQR2 | √ | √ | √ |  |   |  |  | √ |
| Bir011 |  | FQR2 | √ | √ | √ |  |   |  |  | √ |
| Bir012 |  | FQR2 | √ | √ | √ |  |   |  |  | √ |
| Bir013 |  | FQR2 | √ | √ | √ |  |   |  |  | √ |
| Bir014 |  | FQR2 | √ | √ | √ |  |   |  |  | √ |
| Bir015 |  | FQR2 | √ | √ | √ |  |   |  |  | √ |
| Bir016 |  | FQR2 | √ | √ | √ |  |   |  |  | √ |
| Bir017 |  | FQR2 | √ | √ | √ |  |   |  |  | √ |
| Bir018 |  | FQR2 | √ | √ | √ |  |   |  |  | √ |
| Bir019 |  | FQR2 | √ | √ | √ |  |   |  |  | √ |
| Bir020 |  | FQR2 | √ | √ | √ |  |   |  |  | √ |
| Bir021 |  | FQR2 | √ | √ | √ |  |   |  |  | √ |
| Bir022 |  | FQR2 | √ | √ | √ |  |   |  |  | √ |
| Bir023 |  | FQR2 | √ | √ | √ |  | √ |  |  | √ |
| Bir024 |  | FQR2 | √ | √ | √ |  | √ |  |  | √ |
| Bir025 |  | FQR2 | √ | √ | √ |  |   |  |  | √ |
| Bir026 |  | FQR2 | √ | √ | √ |  |   |  |  | √ |
| Bir027 |  | FQR2 | √ | √ | √ |  |   |  |  | √ |
| Bir028 |  | FQR2 | √ | √ | √ |  |   |  |  | √ |
| Bir029 |  | FQR2 | √ | √ | √ |  | √ |  |  | √ |
| Bir030 |  | FQR2 | √ | √ | √ |  |   |  |  | √ |
| Bir031 |  | FQR2 | √ | √ | √ |  | √ |  |  | √ |
| Bir032 |  | FQR2 | √ | √ | √ |  | √ |  |  | √ |
| Bir033 |  | FQR2 | √ | √ | √ |  | √ |  |  | √ |
| Bir034 |  | FQR2 | √ | √ | √ |  | √ |  |  | √ |
| Bir035 |  | FQR2 | √ | √ | √ |  |   |  |  | √ |
| Bir036 |  | FQR2 | √ | √ | √ |  |   |  |  | √ |

|        |                |      |   |   |   |   |  |  |  |   |
|--------|----------------|------|---|---|---|---|--|--|--|---|
| Bir037 |                | FQR2 | √ | √ | √ |   |  |  |  | √ |
| Bir038 |                | FQR2 | √ | √ | √ |   |  |  |  | √ |
| Bir039 |                | FQR2 | √ | √ | √ |   |  |  |  | √ |
| Cam001 | L,08.7605514.Y | FQR2 | √ | √ | √ | √ |  |  |  | √ |
| Cam002 | L,08.7605513.E | FQR2 | √ | √ | √ |   |  |  |  | √ |
| Cam003 | L,08.7612367.D | FQR2 | √ | √ | √ |   |  |  |  | √ |
| Cam004 | L,08.7604515.S | FQR2 | √ | √ | √ |   |  |  |  | √ |
| Cam005 | L,08.7604867.M | FQR2 | √ | √ | √ | √ |  |  |  | √ |
| Cam006 | L,08.7604518.H | FQR2 | √ | √ | √ | √ |  |  |  | √ |
| Cam007 | L,08.7604292.G | FQR2 | √ | √ | √ |   |  |  |  | √ |
| Cam008 | L,09.7720057.L | FQR2 | √ | √ | √ |   |  |  |  | √ |
| Cam009 | L,09.7720055.B | FQR2 | √ |   |   |   |  |  |  | √ |
| Cam010 | L,08.7612770.M | FQR2 | √ | √ | √ |   |  |  |  | √ |
| Cam011 | L,08.7612904.H | FQR2 | √ | √ | √ |   |  |  |  | √ |
| Cam012 | L,08.7612907.C | FQR2 | √ | √ | √ |   |  |  |  | √ |
| Cam013 | L,08.7612906.A | FQR2 | √ | √ | √ |   |  |  |  | √ |
| Cam014 | L,08.7612694.Z | FQR2 | √ | √ | √ |   |  |  |  | √ |
| Cam015 | L,08.7612621.Q | FQR2 | √ | √ | √ |   |  |  |  | √ |
| Cam016 | L,08.7603905.D | FQR2 | √ | √ | √ | √ |  |  |  | √ |
| Cam017 | L,08.7597036.J | FQR2 | √ | √ | √ | √ |  |  |  | √ |
| Cam018 | L,08.7597110.Z | FQR2 | √ | √ | √ | √ |  |  |  | √ |
| Cam019 | L,07.7272911.Y | FQR2 | √ | √ | √ | √ |  |  |  | √ |
| Cam020 | L,07.7271951.S | FQR2 | √ | √ | √ |   |  |  |  | √ |
| Cam021 | L,07.7272912.P | FQR2 | √ | √ | √ | √ |  |  |  | √ |
| Cam022 | L,07.7272687.K | FQR2 | √ | √ | √ | √ |  |  |  | √ |
| Cam023 | L,07.7272910.E | FQR2 | √ | √ | √ | √ |  |  |  | √ |
| Cam024 | L,07.7272685.A | FQR2 | √ | √ | √ | √ |  |  |  | √ |
| Cam025 | L,07.7272686.C | FQR2 | √ | √ | √ |   |  |  |  | √ |
| Cam026 | L,07.7272608.C | FQR2 | √ | √ | √ | √ |  |  |  | √ |
| Cam027 | L,07.7272609.K | FQR2 | √ | √ | √ | √ |  |  |  | √ |
| Cam028 | L,07.7272610.W | FQR2 | √ | √ | √ |   |  |  |  | √ |



|        |                |      |   |   |   |   |  |  |  |   |
|--------|----------------|------|---|---|---|---|--|--|--|---|
| Cam029 | L,07.7272611.A | FQR2 | √ | √ | √ |   |  |  |  | √ |
| Cam030 | L,07.7272605.H | FQR2 | √ | √ | √ |   |  |  |  | √ |
| Cam031 | L,07.7272607.A | FQR2 | √ | √ | √ |   |  |  |  | √ |
| Cam032 | L,07.7270069.E | FQR2 | √ | √ | √ |   |  |  |  | √ |
| Cam033 | L,07.7271955.W | FQR2 | √ | √ | √ |   |  |  |  | √ |
| Cam034 | L,07.7270061.C | FQR2 | √ | √ | √ |   |  |  |  | √ |
| Cam035 | L,07.7270314.G | FQR2 | √ | √ | √ |   |  |  |  | √ |
| Cam036 |                | FQR2 | √ | √ | √ |   |  |  |  | √ |
| Cam037 |                | FQR2 | √ | √ | √ |   |  |  |  | √ |
| Cam038 |                | FQR2 | √ | √ | √ |   |  |  |  | √ |
| Cam039 |                | FQR2 | √ | √ | √ |   |  |  |  | √ |
| Can002 | AO992          | FQR2 | √ | √ | √ |   |  |  |  | √ |
| Can009 | MTL047         | FQR2 | √ | √ | √ |   |  |  |  | √ |
| Can010 | MTL057         | FQR2 | √ | √ | √ |   |  |  |  | √ |
| Can012 | MTL077         | FQR2 | √ | √ | √ |   |  |  |  | √ |
| CD679  |                | FQR2 | √ | √ | √ |   |  |  |  | √ |
| Exe001 | FA0710129      | FQR2 | √ | √ | √ |   |  |  |  | √ |
| Exe002 | FA07011764     | FQR2 | √ | √ | √ |   |  |  |  | √ |
| Exe003 | FA08003371     | FQR2 | √ | √ | √ |   |  |  |  | √ |
| Exe004 | FA07001994     | FQR2 | √ | √ | √ | √ |  |  |  | √ |
| Exe005 | FA07003754     | FQR2 | √ | √ | √ | √ |  |  |  | √ |
| Exe006 | FA07004642     | FQR2 | √ | √ | √ | √ |  |  |  | √ |
| Exe009 | FA0700757      | FQR2 | √ | √ | √ | √ |  |  |  | √ |
| Exe010 | FA07008773     | FQR2 | √ | √ | √ | √ |  |  |  | √ |
| Exe011 | FA07004630     | FQR2 | √ | √ | √ | √ |  |  |  | √ |
| Exe012 | FA07006324     | FQR2 | √ | √ | √ | √ |  |  |  | √ |
| Exe013 | FA07008357     | FQR2 | √ | √ | √ |   |  |  |  | √ |
| Exe014 | FA08002245     | FQR2 | √ | √ | √ |   |  |  |  | √ |
| Exe015 | FA07011040     | FQR2 | √ | √ | √ |   |  |  |  | √ |
| Gla001 |                | FQR2 | √ | √ | √ |   |  |  |  | √ |
| Gla002 |                | FQR2 | √ | √ | √ |   |  |  |  | √ |

|        |      |      |   |   |   |   |  |  |  |   |
|--------|------|------|---|---|---|---|--|--|--|---|
| Gla003 |      | FQR2 | √ | √ | √ |   |  |  |  | √ |
| Gla004 |      | FQR2 | √ | √ | √ |   |  |  |  | √ |
| Gla005 |      | FQR2 | √ | √ | √ |   |  |  |  | √ |
| Gla006 |      | FQR2 | √ | √ | √ |   |  |  |  | √ |
| Gla007 |      | FQR2 | √ | √ | √ |   |  |  |  | √ |
| Gla008 |      | FQR2 | √ | √ | √ |   |  |  |  | √ |
| Gla009 |      | FQR2 | √ | √ | √ |   |  |  |  | √ |
| Gla010 |      | FQR2 | √ | √ | √ |   |  |  |  | √ |
| Gla012 |      | FQR2 | √ | √ | √ |   |  |  |  | √ |
| Gla013 |      | FQR2 | √ | √ | √ |   |  |  |  | √ |
| Gla014 |      | FQR2 | √ | √ | √ |   |  |  |  | √ |
| Gla015 |      | FQR2 | √ | √ | √ |   |  |  |  | √ |
| Gla016 |      | FQR2 | √ | √ | √ |   |  |  |  | √ |
| Gla017 |      | FQR2 | √ | √ | √ |   |  |  |  | √ |
| Gla018 |      | FQR2 | √ | √ | √ |   |  |  |  | √ |
| Gla019 |      | FQR2 | √ | √ | √ |   |  |  |  | √ |
| Gla020 |      | FQR2 | √ | √ | √ |   |  |  |  | √ |
| Gla021 |      | FQR2 | √ | √ | √ |   |  |  |  | √ |
| Gla022 |      | FQR2 | √ | √ | √ |   |  |  |  | √ |
| ham001 | 31H  | FQR2 | √ | √ | √ |   |  |  |  | √ |
| ham002 | 133H | FQR2 | √ | √ | √ |   |  |  |  | √ |
| ham003 | 332H | FQR2 | √ | √ | √ |   |  |  |  | √ |
| ham004 | 97C  | FQR2 | √ | √ | √ | √ |  |  |  | √ |
| ham005 | 44C  | FQR2 | √ | √ | √ | √ |  |  |  | √ |
| ham006 | 53C  | FQR2 | √ | √ | √ |   |  |  |  | √ |
| ham007 | 101C | FQR2 | √ | √ | √ |   |  |  |  | √ |
| ham009 | 217C | FQR2 | √ | √ | √ |   |  |  |  | √ |
| ham010 | 211H | FQR2 | √ | √ | √ |   |  |  |  | √ |
| ham011 | 164C | FQR2 | √ | √ | √ |   |  |  |  | √ |
| Lei001 |      | FQR2 | √ | √ | √ | √ |  |  |  | √ |
| Lei002 |      | FQR2 | √ | √ | √ |   |  |  |  | √ |

|        |       |      |   |   |   |   |  |  |  |   |
|--------|-------|------|---|---|---|---|--|--|--|---|
| Lei003 |       | FQR2 | √ | √ | √ |   |  |  |  | √ |
| Lei004 |       | FQR2 | √ | √ | √ |   |  |  |  | √ |
| Lei006 |       | FQR2 | √ | √ | √ |   |  |  |  | √ |
| Lei007 |       | FQR2 | √ | √ | √ |   |  |  |  | √ |
| Lei009 |       | FQR2 | √ | √ | √ |   |  |  |  | √ |
| Lei010 |       | FQR2 | √ | √ | √ |   |  |  |  | √ |
| Lei011 |       | FQR2 | √ | √ | √ |   |  |  |  | √ |
| Lei012 |       | FQR2 | √ | √ | √ |   |  |  |  | √ |
| Lei013 |       | FQR2 | √ | √ | √ |   |  |  |  | √ |
| Lei014 |       | FQR2 | √ | √ | √ |   |  |  |  | √ |
| Lei015 |       | FQR2 | √ | √ | √ |   |  |  |  | √ |
| Lei016 |       | FQR2 | √ | √ | √ |   |  |  |  | √ |
| Lei017 |       | FQR2 | √ | √ | √ |   |  |  |  | √ |
| Lei018 |       | FQR2 | √ | √ | √ |   |  |  |  | √ |
| Lei019 |       | FQR2 | √ | √ | √ |   |  |  |  | √ |
| Lei020 |       | FQR2 | √ | √ | √ |   |  |  |  | √ |
| Lei021 |       | FQR2 | √ | √ | √ |   |  |  |  | √ |
| Lei022 |       | FQR2 | √ | √ | √ |   |  |  |  | √ |
| Lei023 |       | FQR2 | √ | √ | √ |   |  |  |  | √ |
| Lei024 |       | FQR2 | √ | √ | √ |   |  |  |  | √ |
| Lei026 |       | FQR2 | √ | √ | √ | √ |  |  |  | √ |
| Lei027 |       | FQR2 | √ | √ | √ |   |  |  |  | √ |
| Lei028 |       | FQR2 | √ | √ | √ |   |  |  |  | √ |
| Lei029 |       | FQR2 | √ | √ | √ |   |  |  |  | √ |
| Lei030 |       | FQR2 | √ | √ | √ |   |  |  |  | √ |
| Lei031 |       | FQR2 | √ | √ | √ |   |  |  |  | √ |
| Lei032 |       | FQR2 | √ | √ | √ |   |  |  |  | √ |
| Lei036 |       | FQR2 | √ | √ | √ |   |  |  |  | √ |
| Liv020 | 98076 | FQR2 | √ | √ | √ |   |  |  |  | √ |
| Liv053 | 98034 | FQR2 | √ | √ | √ |   |  |  |  | √ |
| Liv055 | 98043 | FQR2 | √ | √ | √ |   |  |  |  | √ |

|        |        |      |   |   |   |  |  |  |  |   |
|--------|--------|------|---|---|---|--|--|--|--|---|
| Liv056 | 98006  | FQR2 | √ | √ | √ |  |  |  |  | √ |
| Liv057 | 98007  | FQR2 | √ | √ | √ |  |  |  |  | √ |
| Liv059 | 98009  | FQR2 | √ | √ | √ |  |  |  |  | √ |
| Liv061 | 98010  | FQR2 | √ | √ | √ |  |  |  |  | √ |
| Liv062 | 98014  | FQR2 | √ | √ | √ |  |  |  |  | √ |
| Liv081 | 98331  | FQR2 | √ | √ | √ |  |  |  |  | √ |
| Liv083 | 98038  | FQR2 | √ | √ | √ |  |  |  |  | √ |
| Liv086 | 98333  | FQR2 | √ | √ | √ |  |  |  |  | √ |
| Liv096 | 98350  | FQR2 | √ | √ | √ |  |  |  |  | √ |
| Liv097 | 98420  | FQR2 | √ | √ | √ |  |  |  |  | √ |
| Liv1   | 98011  | FQR2 | √ | √ | √ |  |  |  |  | √ |
| Liv10  | 98237  | FQR2 | √ | √ | √ |  |  |  |  | √ |
| Liv100 | 108042 | FQR2 | √ | √ | √ |  |  |  |  | √ |
| Liv101 | 108056 | FQR2 | √ | √ | √ |  |  |  |  | √ |
| Liv102 | 108087 | FQR2 | √ | √ | √ |  |  |  |  | √ |
| Liv103 | 108059 | FQR2 | √ | √ | √ |  |  |  |  | √ |
| Liv104 | 108075 | FQR2 | √ | √ | √ |  |  |  |  | √ |
| Liv11  | 98037  | FQR2 | √ | √ | √ |  |  |  |  | √ |
| Liv127 | 108121 | FQR2 | √ | √ | √ |  |  |  |  | √ |
| Liv131 | 108127 | FQR2 | √ | √ | √ |  |  |  |  | √ |
| Liv132 | 108061 | FQR2 | √ | √ | √ |  |  |  |  | √ |
| Liv136 | 108129 | FQR2 | √ | √ | √ |  |  |  |  | √ |
| Liv15  | 98276  | FQR2 | √ | √ | √ |  |  |  |  | √ |
| Liv180 | 98338  | FQR2 | √ | √ | √ |  |  |  |  | √ |
| Liv182 | 98273  | FQR2 | √ | √ | √ |  |  |  |  | √ |
| Liv184 | 98098  | FQR2 | √ | √ | √ |  |  |  |  | √ |
| Liv186 | 98152  | FQR2 | √ | √ | √ |  |  |  |  | √ |
| Liv188 |        | FQR2 | √ | √ | √ |  |  |  |  | √ |
| Liv189 |        | FQR2 | √ | √ | √ |  |  |  |  | √ |
| Liv190 |        | FQR2 | √ | √ | √ |  |  |  |  | √ |
| Liv3   | 98016  | FQR2 | √ | √ | √ |  |  |  |  | √ |

|         |          |            |   |   |   |   |   |  |  |   |
|---------|----------|------------|---|---|---|---|---|--|--|---|
| Liv41   | 98580    | FQR2       | √ | √ | √ |   |   |  |  | √ |
| lon001  | CD676 II | FQR2       | √ | √ | √ |   |   |  |  | √ |
| lon004  | CD630    | FQR2       | √ | √ | √ |   |   |  |  | √ |
| lon005  | CD682    | FQR2       | √ | √ | √ |   |   |  |  | √ |
| lon006  | CD683    | FQR2       | √ | √ | √ |   |   |  |  | √ |
| LSTM025 | 20070031 | FQR2       | √ | √ | √ |   |   |  |  | √ |
| LSTM026 | 20080107 | FQR2       | √ | √ | √ |   |   |  |  | √ |
| LSTM027 | 20080195 | FQR2       | √ | √ | √ |   |   |  |  | √ |
| LSTM028 | 20080323 | FQR2       | √ | √ | √ |   |   |  |  | √ |
| LSTM029 | 20080533 | FQR2       | √ | √ | √ |   |   |  |  | √ |
| LSTM030 | 20080684 | FQR2       | √ | √ | √ |   |   |  |  | √ |
| LSTM031 | 20080783 | FQR2       | √ | √ | √ |   |   |  |  | √ |
| LSTM032 | BI-8     | FQR2       | √ | √ | √ |   |   |  |  | √ |
| LSTM35  |          | FQR2       | √ | √ | √ | √ | √ |  |  | √ |
| LSTM36  | DS902-06 | FQR2       | √ | √ | √ |   |   |  |  | √ |
| M7404   |          | FQR2       | √ | √ | √ |   |   |  |  | √ |
| R20291  |          | FQR2       | √ | √ | √ | √ | √ |  |  | √ |
| Wal001  | R16760   | FQR2       | √ | √ | √ | √ |   |  |  | √ |
| 2006237 | LSTM003  | Background | √ |   |   |   |   |  |  |   |
| 2007218 |          | Background | √ |   |   |   |   |  |  |   |
| 2007221 |          | Background | √ |   |   |   |   |  |  |   |
| 2007222 | LSTM009  | Background | √ |   |   |   |   |  |  |   |
| 2007223 |          | Background | √ |   |   |   |   |  |  |   |
| 2007235 | LSTM011  | Background | √ |   |   |   |   |  |  |   |
| 2007616 | LSTM012  | Background | √ |   |   |   |   |  |  |   |
| 2007828 | LSTM013  | Background | √ |   |   |   |   |  |  | √ |
| 2007832 | LSTM014  | Background | √ |   |   |   |   |  |  | √ |
| BI-1    | LSTM021  | Background | √ |   |   |   |   |  |  | √ |
| BI-11   |          | Background | √ |   |   |   |   |  |  | √ |
| BI-2    |          | Background | √ |   |   |   |   |  |  |   |
| BI-3    |          | Background | √ |   |   |   |   |  |  | √ |



## Supplementary Note

### Validation of SNP detection

A simulation approach was used to assess the accuracy of short reads mapping and variant detection. A pseudo-sequence was made by introducing artificial variants (single base substitutions, insertions and deletions) into the genome of R20291. The software INDELible<sup>2</sup> was used for this purpose. Default options were implemented, including a JC model<sup>3</sup> and insertion and deletion rates both of 0.1 relative to substitution rate. Two pseudo-genomes (named “scale 1” and “scale 2” for simplicity) with different levels of divergence were created. Scale 1 genome differs from R20291 by 74 SNPs; scale 2 genome differs from R20291 by 869 SNPs. Paired-end Illumina reads generated for R20291 were aligned to pseudo references. This step was performed multiple times, each time with Illumina reads of a different coverage. The range of the tested data coverage is 8.5-fold to 100-fold. For variant detection, four different SNP filtering and validation measures were tested: (I) use default settings in BWA<sup>4</sup> and specify a coverage cut off of >5-fold and < three times the average coverage; (II) by excluding SNPs within repetitive regions following the measure stated in (I); (III) validate SNP alleles by checking at all variant positions in all sequencing reads following the measures stated in (II) and only consider a SNP allele true if it is supported by all sequencing reads; and (IV) validate SNP alleles by checking at all variant positions in all sequencing reads following the measures stated in (II) and only consider a SNP allele true if it is supported by all sequencing reads and the depth for this position is no less than 40, or if it is supported by > 92.5% of the reads and the depth for this position is > 40. The numbers of false positives and false negatives were calculated in each case. The results were plotted as

## Supplementary Fig. 7.

The number of false positive SNPs decreases as data coverage increases, and a minimum of 15-fold coverage is necessary to achieve a result of no false positive SNPs using measures (II), (III) and (IV). The proportion of false negative SNPs also decreases as data coverage increases, except for SNP validation measure (III). The overly stringent validation criterion of (III) rejects more SNPs when data coverage is higher, as this method only considers a SNP allele correct if it is supported by all sequencing reads. A significant number of true SNPs were therefore missed due to a few sequencing errors in abundant reads covering the variant position, despite the majority of the reads indicating the correct allele. Method (IV) is an improvement with respect to this situation, as shown by a false negative rate comparable to method (II), which does not include a SNP validation step. After comparing four SNP validation methods, method (IV) was selected for analyzing the actual sequencing data of *C. difficile* 027/BI/NAP1/027 isolates. This method allows for no false positive SNPs and a false negative rate of 7%-10% when data coverage is above 30-fold, depending on the similarity between subject sequence and reference sequence.

### **Estimates of mutation rate**

We used a full maximum-likelihood model that assumes after an introduction event population expansion is strong enough to result in perfect star genealogies<sup>1</sup>. Almost all SNPs discovered in the early part of FQR2 lineage are private to individual isolates resulting in a star-like topology (Fig. 1a), which supports this assumption. In this calculation, we assumed a population expansion event that started in 2003 reflecting the earliest date of the two isolates found on the node at the base of the star-



like topology. We first conducted the analysis using 61 isolates that are present in the entire star-like topology in the early part of FQR2 lineage. Because this star-like topology still contains bifurcated sub-lineages, which can be considered as a deviation from the expansion model, we selected a subset consisting of 18 isolates that form a perfect star genealogy and performed the analysis again. For both datasets, we randomly selected different numbers of loci or used all loci (Supplementary Table 2) from a total of 3,290 coding sequences spanning 3.34 Mb from the non-repetitive genome. Comparable results were obtained for both data sets (Supplementary Table 2).

We also used two other methods to estimate the mutation rate of *C. difficile* 027/BI/NAP1. Our estimate is  $1.83 \times 10^{-7}$  substitutions per site per year by Path-O-Gen (<http://tree.bio.ed.ac.uk/software/pathogen/>) (Supplementary Fig. 4) and  $1.88 \times 10^{-7}$  substitutions per site per year by BEAST (95% HPD interval is  $1.47 \times 10^{-7} \sim 2.32 \times 10^{-7}$ ). Although these estimates are comparable, there is overall weak correlation in the linear regression analysis (Supplementary Fig. 4). We believe the the spore forming lifestyle of *C. difficile* underlies this weak correlation, as the length of time spent in vegetative form is influenced by stochastic environmental factors, such as host and transmission dynamics, and therefore varies between individual lineages, but the estimates should reflect an average mutation rate.

### **Imports from outside of the *C. difficile* 027/BI/NAP1 lineage**

The largest homologous recombination blocks are found in isolates BI-4 (123kb), BI-11, kor001 and Can007 (134kb and 147kb; these are almost identical between these strains, implying a recombination event in their common ancestor). It is possible that

chromosomal mobilization mediated by integrated mobile elements is the mechanism for these large replacements. Hfr-type chromosomal mobilization from multiple sites in the genome was previously suggested for *S. agalactiae*<sup>5</sup>. A putative phage element was found adjacent to the 147 kb blocks in BI-11, kor001 and Can007.

### **Donors of the recombination blocks**

We have investigated potential donors of the large recombination blocks in the *C. difficile* 027/BI/NAP1 phylogeny by searching relevant regions in our data set against the NCBI nucleotide collection and whole-genome shot gun databases using BLASTn. This was carried out using an automated pipeline and additional manual checks. The top hits (99%~100% similarity) are from a number of ribotype 027 genomes of various geographical sources (including Canada and France). However, the degree of divergence between these sequences and our regions of interest, which is still very low, is similar to the degree of divergence between these regions and other 027/BI/NAP1 isolates in our collection. For example, 235 SNPs are present in a recombination block of 141 kb in isolate kor001 when compared to the reference R20291; this is still 99.8% similarity. We did not identify any sequence that matches our regions of interest perfectly. When these regions were searched against our unpublished *C. difficile* genomes of ribotypes 001, 002, 014, 015, 023 and 106, BLAST search results reported much lower sequence similarity (50~94 in different comparisons). We therefore concluded that potential donors of these regions are likely to be isolates with genomes very similar to ribotype 027 ones.

### **Lack of homologous recombination within the *C. difficile* 027/BI/NAP1 lineage**

Split-decomposition method was used to assess the level of recombination between 027/BI/NAP1 isolates. We constructed a split-decomposition network (Supplementary Fig. 2a) based on 176 SNPs discovered between 34 isolates within the *C. difficile* 027/BI/NAP1 global collection. No site with missing allele information or gap was included. We used 34 taxa instead of the entire *C. difficile* 027/BI/NAP1 global collection because split-decomposition method loses resolution when the number of taxa is large, which is a limitation intrinsic to the algorithm<sup>6</sup>. The fit value for this network is 100.0, suggesting a very good representation of the data<sup>6</sup>. This network is very tree-like, while also agrees with the topologies of the maximum likelihood (Fig. 1a) and neighbor-joining phylogenies (Supplementary Fig. 2b). The unresolved splits at the base of two FQR lineages (Supplementary Fig. 2a) are caused by the single *gyrA* mutation, which has arisen separately in the two FQR lineages. We consider these as sufficient evidence that homologous recombination has not played a major role in shaping the phylogeny of the *C. difficile* 027/BI/NAP1 global collection.

### **Phylogeny of non-human *C. difficile* 027 isolates in the global collection**

All 9 non-human isolates (2 from animals and 7 from food sources) in our collection were found in the FQR1 lineage or the non-epidemic part of the phylogeny. The derived phylogeny suggests that *C. difficile* 027/BI/NAP1 has transmitted between human and non-human sources in both directions. For example, multiple isolates from food sources or animals in Arizona were derived from a historical Arizona human isolate (BI-2 from Tucson, 1991). In a sub-lineage of FQR1, a number of isolates from food sources or animals were found in the exact same position in the phylogeny as human isolates, suggesting an identical genotype; the tip of this sub-lineage being a human isolate from New Jersey (BI-13). These data suggests *C. difficile*

027/BI/NAP1 transmits through the food chain, and human *C. difficile* could contaminate the environment. However, a more comprehensive strain collection would be needed to confirm this.

## **Genetic variation in PaLoc region and emergence of epidemic *C. difficile***

### **027/BI/NAP1**

Although it has been proposed that the emergence of *C. difficile* 027/BI/NAP1 may be due to increased toxin production in these isolates<sup>7-9</sup>, conflicting studies have shown that there was no significant difference in toxin production<sup>10,11</sup>. It was also proposed that the increased toxin production was linked to an 18-bp deletion within the *tcdC* gene of the PaLoc<sup>7,8,9A</sup>. *tcdC* is the negative regulator of toxins A and B (encoded by *tcdA* and *tcdB*) and deletion within this gene is likely to up-regulate toxin production. However, it was later shown that a single base deletion instead of the 18-bp deletion in *tcdC* was associated with increased toxin production<sup>12</sup>.

Perhaps remarkably, only two SNPs were found in the entire 19.6 kb PaLoc region within our *C. difficile* 027/BI/NAP1 collection. One SNP results in a premature stop codon in *tcdB* in isolate 2007825, which could lead to a truncated TcdB that lacks 203 amino acid residues at its C-terminus. Another SNP leads to a residue change (Ser419Ala) in *tcdA* gene in isolate BI-7. Both SNPs are only private to a single isolate. No change in the *tcdC* gene was found. Thus, it is unlikely the genetic changes in PaLoc have had a large functional impact within the 027/BI/NAP1 lineage.

### **Discriminatory SNPs with potential notable functional impact**

Among the discriminatory SNPs discovered (Supplementary Table 4) is an amino acid change (A240D) in a probable transporter. This amino acid change is within the transmembrane helix domain of the protein, which belongs to the PFAM Nramp (PF01566) family (natural resistance-associated macrophage protein family)<sup>13</sup>. This family of proteins normally acts as cation transporters and have been shown to be involved on both ‘sides’ in interactions between intracellular microbial pathogens and their hosts<sup>14,15</sup>. However, there is no evidence that this protein could be involved in host interactions in an extracellular pathogen such as *C. difficile*, and the nature of the amino acid change would suggest impaired protein function in isolates belonging to FQR2 lineage.

### **Non-synonymous homoplasic SNPs**

Our findings include previously known amino acid substitutions (Asp426Asn in *gyrB*, His502Asn and Arg505Lys in *rpoB*)<sup>16,17</sup> as well as novel mutations in *fusA*, including a non-biallelic one. Although resistance to both rifampicin and fusidic acid occurred only in the fluoroquinolone-resistant lineages, there is no evidence for a specific multidrug-resistant strain or lineage, as none of the isolates are resistant to all three antibiotics. The earliest isolates in our collection that developed resistance to rifampicin and fusidic acid are from the USA (2004) and Canada (2003) respectively; while resistance to fluoroquinolones is likely to have developed earlier. Beyond drug resistance, two non-biallelic homoplasic SNPs were found to affect codon 156 (Proline) in *slpA*, which encodes S-layer precursor protein. This single protein undergoes post-translational cleavage and forms two proteins which are major components of surface layer (S-layer)<sup>18</sup>. S-layer acts as an important adhesin promoting interactions between host cells and *C. difficile* bacterium. The finding

seems to suggest strong selection pressure associated with cell-surface modification acting on the gene and the codon in particular.

### **Mobile elements in the *C. difficile* 027/BI/NAP1 lineage**

We found five different versions of CTn5-like elements (Supplementary Fig. 6) in the *C. difficile* 027/BI/NAP1 lineage. These elements, which are highly similar to conjugative transposon 5 (CTn5) in *C. difficile* 630<sup>19</sup>, are present in all isolates in FQR1 and FQR2 lineages, except isolate Cam009 (FQR2), but absent from all isolates outside of either FQR lineage. The simplest version of these elements is found in the majority of FQR1 isolates including BI-7. We named this element Tn6192. Tn6192 is highly similar to CTn5 over the entire sequence. It is particularly conserved (99% nucleotide similarity) in the region encoding ABC transporters and two-component system, but less conserved (82% nucleotide similarity) in its conjugation module when compared to CTn5 in isolate 630. The other four versions of CTn5-like elements in the 027/BI/NAP1 lineage are formed by secondary or tertiary insertions into the Tn6192 backbone; these inserted regions include a 7.5-kb aminoglycoside resistance cassette<sup>20</sup>, three mobile elements named Tn6104, Tn6105, and Tn6106 (Supplementary Fig. 6). Tn6105 is found in all FQR2 isolates (except Cam009) and isolate Lei025 (FQR1) (Fig. 1a and Supplementary Fig. 3), while Tn6106 is exclusively carried by a sub-lineage within the FQR2. Tn6104 – Tn6106 have been previously described in R20291<sup>21</sup>. We assigned the name Tn6193 to the version of combined Tn6192 and Tn6105 (Supplementary Fig. 6). Interestingly, except in R20291 and LSTM035 all CTn5-like elements were found at the same location within the genome, suggesting a hot-spot for integration. In R20291 and LSTM035 it is found in the reverse strand at a different location, implying deletion of

Tn6193 and acquisition of Tn6103, which uniquely contains Tn6104. The complete list of isolates carrying different versions of CTn5-like elements is given as Supplementary Table 6. Beyond CTn5-like elements, all 027/BI/NAP1 isolates in our collection harbor a CTn1-like element carrying chloramphenicol resistance determinant (Supplementary Table 6). FQR1 isolates except Lei025 and BI-7 harbor an element we named Tn6194 (previously called CTnCD11<sup>20</sup>) that contains *ermB*, a gene conferring resistance to erythromycin. We also found a transposon highly similar to CTn3 (630) in isolate Cam036. This CTn3-like element carries the tetracycline-resistance genes *tetM* and *tetL*, while only *tetM* is found in CTn3 in 630.

## REFERENCES

- 1 Morelli, G. *et al.* *Yersinia pestis* genome sequencing identifies patterns of global phylogenetic diversity. *Nat Genet*, (2010).
- 2 Fletcher, W. & Yang, Z. INDELible: a flexible simulator of biological sequence evolution. *Mol Biol Evol* **26**, 1879-1888, (2009).
- 3 Jukes, T. H. & Cantor, C. R. Evolution of protein molecules. *Mammalian protein metabolism* **3**, 21ñ132, (1969).
- 4 Li, H. & Durbin, R. Fast and accurate short read alignment with Burrows-Wheeler transform. *Bioinformatics* **25**, 1754-1760, (2009).
- 5 Brochet, M. *et al.* Shaping a bacterial genome by large chromosomal replacements, the evolutionary history of *Streptococcus agalactiae*. *Proc Natl Acad Sci U S A* **105**, 15961-15966, (2008).
- 6 Huson, D. H. What if I don't have a tree? Split decomposition and related models. *Curr Protoc Bioinformatics* **Chapter 6**, Unit 6 7, (2003).
- 7 Loo, V. G. *et al.* A predominantly clonal multi-institutional outbreak of *Clostridium difficile*-associated diarrhea with high morbidity and mortality. *N Engl J Med* **353**, 2442-2449, (2005).
- 8 McDonald, L. C. *et al.* An epidemic, toxin gene-variant strain of *Clostridium difficile*. *N Engl J Med* **353**, 2433-2441, (2005).
- 9 Warny, M. *et al.* Toxin production by an emerging strain of *Clostridium difficile* associated with outbreaks of severe disease in North America and Europe. *Lancet* **366**, 1079-1084, (2005).
- 10 Akerlund, T. *et al.* Increased sporulation rate of epidemic *Clostridium difficile* Type 027/NAP1. *J Clin Microbiol* **46**, 1530-1533, (2008).
- 11 Merrigan, M. *et al.* Human hypervirulent *Clostridium difficile* strains exhibit increased sporulation as well as robust toxin production. *J Bacteriol* **192**, 4904-4911, (2010).
- 12 Matamouros, S., England, P. & Dupuy, B. *Clostridium difficile* toxin expression is inhibited by the novel regulator TcdC. *Mol Microbiol* **64**, 1274-1288, (2007).
- 13 Finn, R. D. *et al.* The Pfam protein families database. *Nucleic Acids Res* **36**, D281-288, (2008).
- 14 Govoni, G. & Gros, P. Macrophage NRAMP1 and its role in resistance to microbial infections. *Inflamm Res* **47**, 277-284, (1998).
- 15 Pinner, E., Gruenheid, S., Raymond, M. & Gros, P. Functional complementation of the yeast divalent cation transporter family SMF by NRAMP2, a member of the mammalian natural resistance-associated macrophage protein family. *J Biol Chem* **272**, 28933-28938, (1997).
- 16 O'Connor, J. R. *et al.* Rifampin and rifaximin resistance in clinical isolates of *Clostridium difficile*. *Antimicrob Agents Chemother* **52**, 2813-2817, (2008).
- 17 Spigaglia, P. *et al.* Fluoroquinolone resistance in *Clostridium difficile* isolates from a prospective study of *C. difficile* infections in Europe. *Journal of medical microbiology* **57**, 784-789, (2008).
- 18 Calabi, E. *et al.* Molecular characterization of the surface layer proteins from *Clostridium difficile*. *Molecular Microbiology* **40**, 1187-1199, (2001).



- 19 Sebaihia, M. *et al.* The multidrug-resistant human pathogen *Clostridium difficile* has a highly mobile, mosaic genome. *Nat Genet* **38**, 779-786, (2006).
- 20 He, M. *et al.* Evolutionary dynamics of *Clostridium difficile* over short and long time scales. *Proc Natl Acad Sci U S A* **107**, 7527-7532, (2010).
- 21 Brouwer, M. S. M., Warburton, P. J., Roberts, A. P., Mullany, P. & Allan, E. Genetic Organisation, Mobility and Predicted Functions of Genes on Integrated, Mobile Genetic Elements in Sequenced Strains of *Clostridium difficile*. *PLoS ONE* **6**, e23014, (2011).
